# Supplementary material for: Designing and comparative analysis of anti-oxidant and heat shock proteins based multi-epitopic filarial vaccines
Source: PubMed Central journal article supplement — BMC Infect Dis. 2024 Dec 18;24:1436. doi: 10.1186/s12879-024-10272-9 (PMC11654384; doi:10.1186/s12879-024-10272-9), 2024-12-18
Supplement: 12879_2024_10272_MOESM1_ESM.pdf [file 12879_2024_10272_MOESM1_ESM.pdf]

**Table 1.** Prediction of the subcellular localization of eukaryotic proteins using DeepLoc server which differentiates between 10 different localizations

|                   |              |              |               |                       |                       |                       |                       |                       |                       |                 |                 |
|-------------------|--------------|--------------|---------------|-----------------------|-----------------------|-----------------------|-----------------------|-----------------------|-----------------------|-----------------|-----------------|
| PV <sub>AO</sub>  | Localization | Cytoplasm    | Peroxisome    | Mitochondria          | Lysosome              | Cell membrane         | Extracellular         | Plastid               | Endoplasmic reticulum | Golgi apparatus | Nucleus         |
|                   | Likelihood   | 0.4748       | 0.1458        | 0.128                 | 0.0886                | 0.0608                | 0.0464                | 0.0244                | 0.02                  | 0.006           | 0.0051          |
|                   | Type         | Soluble      | Membrane      |                       |                       |                       |                       |                       |                       |                 |                 |
|                   | Likelihood   | 0.8146       | 0.1854        |                       |                       |                       |                       |                       |                       |                 |                 |
| PV <sub>HSP</sub> | Localization | Cytoplasm    | Peroxisome    | Lysosome              | Cell membrane         | Plastid               | Endoplasmic reticulum | Mitochondria          | Nucleus               | Extracellular   | Golgi apparatus |
|                   | Likelihood   | 0.3292       | 0.2826        | 0.1197                | 0.0745                | 0.0525                | 0.0436                | 0.0418                | 0.0247                | 0.0178          | 0.0136          |
|                   | Type         | Soluble      | Membrane      |                       |                       |                       |                       |                       |                       |                 |                 |
|                   | Likelihood   | 0.6503       | 0.3497        |                       |                       |                       |                       |                       |                       |                 |                 |
| SOD               | Localization | Mitochondria | Peroxisome    | Extracellular         | Cytoplasm             | Plastid               |                       |                       |                       |                 |                 |
|                   | Likelihood   | 0.9993       | 0.0002        | 0.0002                | 0.0002                | 0.0001                |                       |                       |                       |                 |                 |
|                   | Type         | Soluble      | Membrane      |                       |                       |                       |                       |                       |                       |                 |                 |
|                   | Likelihood   | 0.7678       | 0.2322        |                       |                       |                       |                       |                       |                       |                 |                 |
| GST               | Localization | Cytoplasm    | Cell membrane | Mitochondria          | Peroxisome            | Nucleus               | Endoplasmic reticulum |                       | Golgi apparatus       | Lysosome        |                 |
|                   | Likelihood   | 0.8887       | 0.0715        | 0.012                 | 0.0078                | 0.0074                | 0.0072                |                       | 0.0039                | 0.0009          |                 |
|                   | Type         | Soluble      | Membrane      |                       |                       |                       |                       |                       |                       |                 |                 |
|                   | Likelihood   | 0.936        | 0.064         |                       |                       |                       |                       |                       |                       |                 |                 |
| GPx               | Localization | Cytoplasm    | Mitochondria  | Cytoplasm             | Endoplasmic reticulum | Golgi apparatus       |                       |                       |                       |                 |                 |
|                   | Likelihood   | 0.8812       | 0.0913        | 0.021                 | 0.0026                | 0.0039                |                       |                       |                       |                 |                 |
|                   | Type         | Soluble      | Membrane      |                       |                       |                       |                       |                       |                       |                 |                 |
|                   | Likelihood   | 0.8593       | 0.1407        |                       |                       |                       |                       |                       |                       |                 |                 |
| HSP70             | Localization | Cytoplasm    | Peroxisome    | Mitochondria          | Plastid               | Nucleus               | Lysosome              | Endoplasmic reticulum | Cell membrane         | Golgi apparatus |                 |
|                   | Likelihood   | 0.9096       | 0.0537        | 0.0133                | 0.0063                | 0.006                 | 0.0053                | 0.0034                | 0.0014                | 0.0007          |                 |
|                   | Type         | Soluble      | Membrane      |                       |                       |                       |                       |                       |                       |                 |                 |
|                   | Likelihood   | 0.9902       | 0.0098        |                       |                       |                       |                       |                       |                       |                 |                 |
| HSP90             | Localization | Cytoplasm    | Nucleus       | Endoplasmic reticulum | Lysosome              | Peroxisome            | Cell membrane         | Golgi apparatus       | Mitochondria          | Extracellular   |                 |
|                   | Likelihood   | 0.9611       | 0.0266        | 0.0066                | 0.0037                | 0.0006                | 0.0004                | 0.0004                | 0.0003                | 0.0003          |                 |
|                   | Type         | Soluble      | Membrane      |                       |                       |                       |                       |                       |                       |                 |                 |
|                   | Likelihood   | 0.9991       | 0.0009        |                       |                       |                       |                       |                       |                       |                 |                 |
| HSP110            | Localization | Cytoplasm    | Nucleus       | Lysosome              | Peroxisome            | Endoplasmic reticulum | Mitochondria          | Plastid               | Cell membrane         | Golgi apparatus | Extracellular   |
|                   | Likelihood   | 0.852        | 0.1293        | 0.0054                | 0.0039                | 0.0028                | 0.0025                | 0.0016                | 0.0013                | 0.0007          | 0.0004          |
|                   | Type         | Soluble      | Membrane      |                       |                       |                       |                       |                       |                       |                 |                 |
|                   | Likelihood   | 0.9943       | 0.0057        |                       |                       |                       |                       |                       |                       |                 |                 |

**Table 2.** Shared identity of the selected human anti-oxidant and heat shock proteins with vaccine construct.

| S.N. | Vaccine construct | Human protein | Identity (%) | Similarity (%) | Matching Score |
|------|-------------------|---------------|--------------|----------------|----------------|
| 1    | PV <sub>AO</sub>  | GST           | 6.20         | 9.4            | 62.2           |
| 2    |                   | SOD           | 11.2         | 14.4           | 73.4           |
| 3    |                   | GPx           | 8.0          | 11.2           | 77.9           |
| 4    | PV <sub>HSP</sub> | HSP70         | 11.5         | 17.8           | 91.0           |
| 5    |                   | HSP90         | 4.5          | 5.8            | 55.5           |
| 6    |                   | HSP110        | 9.0          | 14.5           | 52.0           |

**Table 3.** Evaluation of Antigenicity, Allergenicity and Physiochemical properties of Antioxidant and Heat shock proteins

| Name of protein | AntigenPro score | Solubility | No. of amino acids | Molecular weight (Da) | Theoretical isoelectric Point(PI) | Theoretical Formula                          | Total no. of atoms | Estimate half life                                                                                                     | Instability index | Aliphatic index | GRAVY index |
|-----------------|------------------|------------|--------------------|-----------------------|-----------------------------------|----------------------------------------------|--------------------|------------------------------------------------------------------------------------------------------------------------|-------------------|-----------------|-------------|
| SOD             | 0.826141         | 0.901803   | 223                | 25097.14              | 8.81                              | C 1136<br>H 1788<br>N 304<br>O 317<br>S 10   | 3555               | 30 hours (mammalian reticulocytes, in vitro).<br>>20 hours (yeast, in vivo).<br>>10 hours (Escherichia coli, in vivo). | 30.97             | 96.68           | -0.174      |
| GPx             | 0.818261         | 0.543441   | 220                | 24880.56              | 7.59                              | C 1130<br>H 1728<br>N 290<br>O 322<br>S 11   | 3481               | 30 hours (mammalian reticulocytes, in vitro).<br>>20 hours (yeast, in vivo).<br>>10 hours (Escherichia coli, in vivo)  | 26.91             | 78.86           | -0.240      |
| GST             | 0.517046         | 0.901803   | 208                | 24226.81              | 6.79                              | C 1090<br>H 1697<br>N 297<br>O 311<br>S 9    | 3404               | 30 hours (mammalian reticulocytes, in vitro).<br>>20 hours (yeast, in vivo).<br>>10 hours (Escherichia coli, in vivo). | 30.29             | 86.73           | -0.523      |
| HSP110          | 0.915828         | 0.901803   | 817                | 92521.91              | 5.48                              | C 4090<br>H 6471<br>N 1119<br>O 1265<br>S 30 | 12975              | 30 hours (mammalian reticulocytes, in vitro).<br>>20 hours (yeast, in vivo).<br>>10 hours (Escherichia coli, in vivo). | 39.85             | 76.38           | -0.571      |
| HSP90           | 0.677248         | 0.901803   | 717                | 82604.71              | 4.98                              | C 3651<br>H 5813<br>N 957<br>O 1162<br>S 28  | 11611              | 30 hours (mammalian reticulocytes, in vitro).<br>>20 hours (yeast, in vivo).<br>>10 hours (Escherichia coli, in vivo). | 40.90             | 80.63           | -0.637      |
| HSP70           | 0.923227         | 0.90180    | 645                | 70356.50              | 5.56                              | C 3078<br>H 4947<br>N 859<br>O 983<br>S 20   | 9887               | 30 hours (mammalian reticulocytes, in vitro).<br>>20 hours (yeast, in vivo).<br>>10 hours (Escherichia coli, in vivo). | 39.95             | 79.27           | -0.446      |

**Table 4.** IFN- $\gamma$  epitope of antioxidant and heat shock proteins of filarial parasite

| Peptide | Sequence             | Method | Result   | Score        |
|---------|----------------------|--------|----------|--------------|
| SOD     | LRGDAGVSGIIFYQQSGGS  | MERCI  | NEGATIVE | 1            |
|         | NGCTSAGDHY           | MERCI  | NEGATIVE | 1            |
|         | DIKLRGPLSVIGHSLVVH   | MERCI  | NEGATIVE | 2            |
|         | ITTISGSVS            | SVM    | NEGATIVE | -0.43281269  |
|         | SGSVSGLTPGLHGFVHQYG  | SVM    | POSITIVE | 1.5438308    |
|         | DQT                  | SVM    | POSITIVE | 1.3440322    |
|         | AGDHYNP              | SVM    | NEGATIVE | -0.14867243  |
|         | NPFGKTHGGPNDRIKHIGDL | SVM    | POSITIVE | 0.94673579   |
|         | GNIVAGANG            | SVM    | NEGATIVE | -0.21317333  |
|         | ANTDDLQGTGNMREESLK   | SVM    | NEGATIVE | -0.021679592 |
| GPx     | TGNAGSRLAC           | SVM    | NEGATIVE | -0.59914591  |
|         | YEFTVKDI             | MERCI  | POSITIVE | 1            |
|         | CKSGATDKNYRQLQEMHTRL | MERCI  | POSITIVE | 1            |
|         | NGVDVSLEKYRGHVCLIVNV | MERCI  | NEGATIVE | 2            |
|         | VNGSDADDLY           | MERCI  | NEGATIVE | 1            |
|         | NQFGGQEPWAEAEIKKFVTE | SVM    | POSITIVE | 1.133996     |
|         | KYGVQFDMFSKIKV       | SVM    | NEGATIVE | -0.49531073  |
|         | FLKSRQHGTLTNNIKWNFSK | SVM    | POSITIVE | 1.329577     |

|         |                       |       |          |              |
|---------|-----------------------|-------|----------|--------------|
| GST     | QPVKRYSPPTAPYDIEGDIM  | SVM   | NEGATIVE | -0.14343861  |
|         | DRINASDWPSMKSHFHFGQ   | MERCI | POSITIVE | 1            |
|         | LPCLYDGDHQIVQSG       | MERCI | POSITIVE | 1            |
|         | PIRLVLVDQGIKFTD       | MERCI | NEGATIVE | 1            |
|         | AILRHLA               | SVM   | NEGATIVE | -0.022975403 |
|         | RKHNLNGGNELETTID      | SVM   | NEGATIVE | -0.2516892   |
|         | MFCEGVRLDHTKYTKMIYQA  | SVM   | POSITIVE | 1.0405944    |
|         | ILPVELAKFE            | SVM   | NEGATIVE | -0.43792163  |
|         | KLLATRD               | SVM   | POSITIVE | 0.093108711  |
|         | DGKNFILGEKISYVDFVLFE  | SVM   | POSITIVE | 1.7967633    |
| HSP 110 | CLDKFPLLKAYHQRMEDRPG  | SVM   | POSITIVE | 1.4030477    |
|         | RVRILLTNLLRESGKKAEEV  | MERCI | POSITIVE | 1            |
|         | AAMKCAILSPAFAKVRDFSVK | MERCI | NEGATIVE | 1            |
|         | PPKAEPAKEPEKGSDDGQKGE | SVM   | POSITIVE | 0.570793     |
|         | ETDDTKG               | SVM   | POSITIVE | 0.046773     |
| HSP 90  | NQEKEENTNAPSNDVLP     | SVM   | POSITIVE | 0.505780     |
|         | AFTTRGRSMGVAAARQQLNTN | SVM   | POSITIVE | 0.502655     |
|         | DDEAEEE               | MERCI | POSITIVE | 1            |
|         | DEEEDKKEKDKK          | SVM   | NEGATIVE | -0.930605    |
|         | GEIEDVGE              | SVM   | POSITIVE | 0.7048250    |
| HSP 70  | KKDEDKEKKE            | SVM   | NEGATIVE | -0.784628    |
|         | LAVKHFSVEGQLEFRALLFV  | SVM   | POSITIVE | 1.261721     |
|         | KSTAGDTHLGGEDFDNRMVN  | MERCI | POSITIVE | 5            |
|         | MPGGMPGAPGAGSTGGGPT   | MERCI | NEGATIVE | 5            |
|         | SAGGMPGG              | SVM   | POSITIVE | 0.5289680    |
|         | AVITVPAYFNDSQRQATKDS  | SVM   | POSITIVE | 0.8848280    |

**Table 5.** Predicted Discontinuous B-cell epitopes of PV<sub>AO</sub> and PV<sub>HSP</sub>

| No. PV <sub>AO</sub> | Residues                                                                                                                                                                                                                                                                                                                                                                                                                                                                                                                                                                                                                                                                                                                                                                                                                                                                                                                                                                                                                                                                                                                                                                                                                                                                                                                                                                                                                                                                                                                                                                                                                                                                                                                                                                                                                                                                                                                                                                                                                                                                                                                                                                                                                                                                                                                                                                                                                                                                                                                                         | Number of residues | Score |
|----------------------|--------------------------------------------------------------------------------------------------------------------------------------------------------------------------------------------------------------------------------------------------------------------------------------------------------------------------------------------------------------------------------------------------------------------------------------------------------------------------------------------------------------------------------------------------------------------------------------------------------------------------------------------------------------------------------------------------------------------------------------------------------------------------------------------------------------------------------------------------------------------------------------------------------------------------------------------------------------------------------------------------------------------------------------------------------------------------------------------------------------------------------------------------------------------------------------------------------------------------------------------------------------------------------------------------------------------------------------------------------------------------------------------------------------------------------------------------------------------------------------------------------------------------------------------------------------------------------------------------------------------------------------------------------------------------------------------------------------------------------------------------------------------------------------------------------------------------------------------------------------------------------------------------------------------------------------------------------------------------------------------------------------------------------------------------------------------------------------------------------------------------------------------------------------------------------------------------------------------------------------------------------------------------------------------------------------------------------------------------------------------------------------------------------------------------------------------------------------------------------------------------------------------------------------------------|--------------------|-------|
| 1                    | E <sup>33</sup> , T <sup>35</sup> , A <sup>36</sup> , A <sup>37</sup> , A <sup>38</sup> , P <sup>39</sup> , V <sup>40</sup> , A <sup>41</sup> , V <sup>42</sup> , A <sup>43</sup> , A <sup>44</sup> , A <sup>45</sup> , G <sup>46</sup> , A <sup>47</sup> , A <sup>48</sup> , P <sup>49</sup> , A <sup>50</sup> , G <sup>51</sup> , A <sup>52</sup> , A <sup>53</sup> , V <sup>54</sup> , E <sup>55</sup> , A <sup>56</sup> , A <sup>57</sup> , E <sup>58</sup> , E <sup>59</sup> , Q <sup>60</sup> , S <sup>61</sup> , E <sup>62</sup> , F <sup>63</sup> , D <sup>64</sup> , V <sup>65</sup> , I <sup>66</sup> , L <sup>67</sup> , E <sup>68</sup> , A <sup>69</sup> , A <sup>70</sup> , G <sup>71</sup> , D <sup>72</sup> , K <sup>73</sup> , K <sup>74</sup> , I <sup>75</sup> , G <sup>76</sup> , V <sup>77</sup> , I <sup>78</sup> , K <sup>79</sup> , V <sup>80</sup> , V <sup>81</sup> , R <sup>82</sup> , E <sup>83</sup> , A <sup>84</sup> , A <sup>100</sup> , P <sup>101</sup> , K <sup>102</sup> , P <sup>103</sup> , L <sup>104</sup> , L <sup>105</sup> , E <sup>106</sup> , K <sup>107</sup>                                                                                                                                                                                                                                                                                                                                                                                                                                                                                                                                                                                                                                                                                                                                                                                                                                                                                                                                                                                                                                                                                                                                                                                                                                                                                                                                                                                                                                      | 59                 | 0.772 |
| 2                    | G <sup>667</sup> , P <sup>668</sup> , G <sup>669</sup> , M <sup>670</sup> , F <sup>671</sup> , C <sup>672</sup> , E <sup>673</sup> , G <sup>674</sup> , V <sup>675</sup> , R <sup>676</sup> , D <sup>677</sup> , L <sup>678</sup> , H <sup>679</sup> , T <sup>680</sup> , K <sup>681</sup> , Y <sup>682</sup> , T <sup>683</sup> , K <sup>684</sup> , M <sup>685</sup> , I <sup>686</sup> , Y <sup>687</sup> , Q <sup>688</sup> , A <sup>689</sup> , G <sup>690</sup> , I <sup>695</sup> , L <sup>696</sup> , G <sup>705</sup> , P <sup>706</sup> , G <sup>707</sup> , P <sup>708</sup> , G <sup>709</sup> , C <sup>710</sup> , L <sup>711</sup> , D <sup>712</sup> , K <sup>713</sup> , F <sup>714</sup> , P <sup>715</sup> , L <sup>716</sup> , L <sup>717</sup> , K <sup>718</sup> , A <sup>719</sup> , Y <sup>720</sup> , H <sup>721</sup> , Q <sup>722</sup> , R <sup>723</sup> , D <sup>726</sup> , R <sup>727</sup> , P <sup>728</sup> , G <sup>746</sup> , D <sup>747</sup> , G <sup>748</sup> , K <sup>749</sup> , N <sup>750</sup> , F <sup>751</sup> , I <sup>752</sup> , L <sup>753</sup> , G <sup>754</sup> , E <sup>755</sup> , K <sup>756</sup> , I <sup>757</sup> , S <sup>758</sup> , Y <sup>759</sup> , V <sup>760</sup> , D <sup>761</sup> , F <sup>762</sup> , V <sup>763</sup> , L <sup>764</sup> , F <sup>765</sup> , E <sup>766</sup> , G <sup>767</sup> , P <sup>768</sup> , G <sup>769</sup> , P <sup>770</sup> , G <sup>771</sup> , I <sup>772</sup> , I <sup>773</sup> , Y <sup>774</sup> , A <sup>775</sup> , A <sup>776</sup> , Y <sup>777</sup> , V <sup>778</sup> , A <sup>779</sup> , E <sup>780</sup> , V <sup>781</sup> , Y <sup>782</sup> , A <sup>783</sup> , Y <sup>786</sup> , A <sup>790</sup> , T <sup>793</sup> , E <sup>794</sup> , K <sup>795</sup> , D <sup>796</sup> , S <sup>797</sup> , Y <sup>798</sup> , A <sup>799</sup> , A <sup>800</sup> , Y <sup>801</sup> , H <sup>802</sup> , H <sup>803</sup> , H <sup>804</sup> , H <sup>805</sup> , H <sup>806</sup> , H <sup>807</sup>                                                                                                                                                                                                                                                                                                                                                                                                                                                                                                               | 103                | 0.765 |
| 3                    | P <sup>255</sup> , G <sup>256</sup> , P <sup>257</sup> , G <sup>258</sup> , N <sup>259</sup> , G <sup>260</sup> , C <sup>261</sup> , T <sup>262</sup> , S <sup>263</sup> , A <sup>264</sup> , G <sup>265</sup> , D <sup>266</sup> , H <sup>267</sup> , Y <sup>268</sup> , G <sup>269</sup> , P <sup>270</sup> , G <sup>271</sup> , P <sup>272</sup> , G <sup>273</sup> , N <sup>274</sup> , P <sup>275</sup> , F <sup>276</sup> , G <sup>277</sup> , T <sup>279</sup> , H <sup>280</sup> , G <sup>283</sup>                                                                                                                                                                                                                                                                                                                                                                                                                                                                                                                                                                                                                                                                                                                                                                                                                                                                                                                                                                                                                                                                                                                                                                                                                                                                                                                                                                                                                                                                                                                                                                                                                                                                                                                                                                                                                                                                                                                                                                                                                                      | 26                 | 0.735 |
| 4                    | Y <sup>464</sup> , G <sup>465</sup> , V <sup>466</sup> , Q <sup>467</sup> , F <sup>468</sup> , D <sup>469</sup> , M <sup>470</sup> , F <sup>471</sup> , S <sup>472</sup> , K <sup>473</sup> , I <sup>474</sup> , K <sup>475</sup> , G <sup>476</sup> , P <sup>477</sup> , G <sup>478</sup> , P <sup>479</sup> , G <sup>480</sup> , F <sup>481</sup> , L <sup>482</sup> , K <sup>483</sup> , S <sup>484</sup> , R <sup>485</sup> , Q <sup>486</sup> , H <sup>487</sup> , G <sup>488</sup> , T <sup>489</sup> , L <sup>490</sup> , N <sup>493</sup> , K <sup>495</sup> , W <sup>496</sup> , N <sup>497</sup> , G <sup>505</sup> , V <sup>506</sup> , N <sup>507</sup> , G <sup>508</sup> , S <sup>509</sup> , D <sup>510</sup> , A <sup>511</sup> , D <sup>512</sup> , D <sup>513</sup> , L <sup>514</sup> , Y <sup>515</sup> , K <sup>516</sup> , G <sup>517</sup> , P <sup>518</sup> , G <sup>519</sup> , P <sup>520</sup> , G <sup>521</sup> , F <sup>522</sup> , L <sup>523</sup> , K <sup>524</sup> , S <sup>525</sup> , R <sup>526</sup> , G <sup>546</sup> , Q <sup>547</sup> , P <sup>548</sup> , V <sup>549</sup> , K <sup>550</sup> , R <sup>551</sup> , Y <sup>552</sup> , S <sup>553</sup> , P <sup>554</sup> , T <sup>555</sup> , T <sup>556</sup> , A <sup>557</sup> , P <sup>558</sup> , Y <sup>559</sup> , D <sup>560</sup> , I <sup>561</sup> , E <sup>562</sup> , G <sup>563</sup> , D <sup>564</sup> , I <sup>565</sup> , M <sup>566</sup> , G <sup>567</sup> , P <sup>568</sup> , G <sup>569</sup> , F <sup>584</sup> , T <sup>585</sup> , G <sup>587</sup> , P <sup>588</sup> , G <sup>589</sup> , P <sup>590</sup> , G <sup>591</sup> , D <sup>592</sup> , R <sup>593</sup> , I <sup>594</sup> , N <sup>595</sup> , A <sup>596</sup> , S <sup>597</sup> , D <sup>598</sup> , W <sup>599</sup> , P <sup>600</sup> , S <sup>601</sup> , M <sup>602</sup> , G <sup>611</sup> , P <sup>612</sup> , G <sup>613</sup> , P <sup>614</sup> , G <sup>615</sup> , L <sup>616</sup> , P <sup>617</sup> , C <sup>618</sup> , L <sup>619</sup> , Y <sup>620</sup> , D <sup>623</sup> , G <sup>631</sup> , P <sup>632</sup> , G <sup>633</sup> , P <sup>634</sup> , G <sup>635</sup> , A <sup>636</sup> , I <sup>637</sup> , L <sup>638</sup> , R <sup>639</sup> , H <sup>640</sup> , L <sup>641</sup> , A <sup>642</sup> , G <sup>643</sup> , P <sup>644</sup> , G <sup>645</sup> , P <sup>646</sup> , G <sup>647</sup> , R <sup>648</sup> , K <sup>649</sup> , H <sup>650</sup> , N <sup>651</sup> , L <sup>652</sup> , N <sup>653</sup> | 129                | 0.685 |

|   |                                                                                                                                                                                                                                                                                                                                                                                                                                                                                                                                                                                                                                                                                                                                                                                                                                                                                                                                                                                                                                                                                                                                                                                                                                                                                                                                                                                                                                                                                                                                                                                                                                                                                                                                                                                                                                                                                                                                                                                                                                                                                                                                                                                                                                                                                                                                                                                                                                                                                                                                                                                                                                                                                                                                                                                                                                                                                                                                                                                                                                                                                                     |     |       |
|---|-----------------------------------------------------------------------------------------------------------------------------------------------------------------------------------------------------------------------------------------------------------------------------------------------------------------------------------------------------------------------------------------------------------------------------------------------------------------------------------------------------------------------------------------------------------------------------------------------------------------------------------------------------------------------------------------------------------------------------------------------------------------------------------------------------------------------------------------------------------------------------------------------------------------------------------------------------------------------------------------------------------------------------------------------------------------------------------------------------------------------------------------------------------------------------------------------------------------------------------------------------------------------------------------------------------------------------------------------------------------------------------------------------------------------------------------------------------------------------------------------------------------------------------------------------------------------------------------------------------------------------------------------------------------------------------------------------------------------------------------------------------------------------------------------------------------------------------------------------------------------------------------------------------------------------------------------------------------------------------------------------------------------------------------------------------------------------------------------------------------------------------------------------------------------------------------------------------------------------------------------------------------------------------------------------------------------------------------------------------------------------------------------------------------------------------------------------------------------------------------------------------------------------------------------------------------------------------------------------------------------------------------------------------------------------------------------------------------------------------------------------------------------------------------------------------------------------------------------------------------------------------------------------------------------------------------------------------------------------------------------------------------------------------------------------------------------------------------------------|-----|-------|
| 5 | K <sup>414</sup> , S <sup>415</sup> , G <sup>416</sup> , A <sup>417</sup> , T <sup>418</sup> , D <sup>419</sup> , K <sup>420</sup> , N <sup>421</sup> , Y <sup>422</sup> , R <sup>423</sup> , L <sup>425</sup> , Q <sup>426</sup> , E <sup>427</sup> , M <sup>428</sup> , H <sup>429</sup> , T <sup>430</sup> , R <sup>431</sup>                                                                                                                                                                                                                                                                                                                                                                                                                                                                                                                                                                                                                                                                                                                                                                                                                                                                                                                                                                                                                                                                                                                                                                                                                                                                                                                                                                                                                                                                                                                                                                                                                                                                                                                                                                                                                                                                                                                                                                                                                                                                                                                                                                                                                                                                                                                                                                                                                                                                                                                                                                                                                                                                                                                                                                    | 17  | 0.681 |
| 6 | G <sup>287</sup> , D <sup>290</sup> , R <sup>291</sup> , I <sup>292</sup> , K <sup>293</sup> , H <sup>294</sup> , I <sup>295</sup> , G <sup>296</sup> , D <sup>297</sup> , L <sup>298</sup> , G <sup>299</sup> , N <sup>300</sup> , I <sup>301</sup> , V <sup>302</sup> , A <sup>303</sup> , G <sup>304</sup> , A <sup>305</sup> , N <sup>306</sup> , G <sup>307</sup> , G <sup>308</sup> , P <sup>309</sup> , G <sup>310</sup> , P <sup>311</sup> , G <sup>312</sup> , D <sup>313</sup> , V <sup>329</sup> , H <sup>330</sup> , A <sup>331</sup> , G <sup>332</sup> , P <sup>333</sup> , G <sup>334</sup> , P <sup>335</sup> , G <sup>336</sup> , A <sup>337</sup> , N <sup>338</sup> , D <sup>339</sup> , D <sup>340</sup> , L <sup>341</sup> , G <sup>342</sup> , Q <sup>343</sup> , G <sup>344</sup> , G <sup>345</sup> , P <sup>346</sup> , G <sup>347</sup> , P <sup>348</sup> , G <sup>349</sup> , T <sup>350</sup> , G <sup>374</sup> , Y <sup>375</sup> , E <sup>376</sup> , F <sup>377</sup> , T <sup>378</sup> , Q <sup>424</sup>                                                                                                                                                                                                                                                                                                                                                                                                                                                                                                                                                                                                                                                                                                                                                                                                                                                                                                                                                                                                                                                                                                                                                                                                                                                                                                                                                                                                                                                                                                                                                                                                                                                                                                                                                                                                                                                                                                                                                                                                                                                        | 53  | 0.628 |
| 7 | P <sup>162</sup> , G <sup>163</sup> , P <sup>164</sup> , G <sup>165</sup> , F <sup>166</sup> , I <sup>168</sup> , R <sup>169</sup> , G <sup>170</sup> , A <sup>172</sup> , E <sup>173</sup> , G <sup>174</sup> , P <sup>175</sup> , G <sup>176</sup> , P <sup>177</sup> , G <sup>178</sup> , D <sup>179</sup> , D <sup>180</sup> , P <sup>199</sup> , G <sup>200</sup> , I <sup>201</sup> , I <sup>202</sup> , Y <sup>203</sup> , F <sup>204</sup> , Q <sup>205</sup> , Q <sup>206</sup> , G <sup>207</sup> , S <sup>208</sup> , G <sup>209</sup> , G <sup>210</sup> , S <sup>211</sup> , I <sup>212</sup> , T <sup>213</sup> , T <sup>214</sup> , I <sup>215</sup> , P <sup>232</sup> , G <sup>233</sup> , P <sup>234</sup> , G <sup>235</sup> , L <sup>236</sup> , H <sup>237</sup> , G <sup>238</sup> , F <sup>239</sup> , H <sup>240</sup> , G <sup>241</sup> , P <sup>242</sup>                                                                                                                                                                                                                                                                                                                                                                                                                                                                                                                                                                                                                                                                                                                                                                                                                                                                                                                                                                                                                                                                                                                                                                                                                                                                                                                                                                                                                                                                                                                                                                                                                                                                                                                                                                                                                                                                                                                                                                                                                                                                                                                                                                                                                | 45  | 0.62  |
| 8 | E <sup>121</sup> , A <sup>122</sup> , A <sup>123</sup> , G <sup>124</sup> , A <sup>125</sup> , T <sup>126</sup> , V <sup>127</sup> , T <sup>128</sup> , V <sup>129</sup> , K <sup>130</sup> , E <sup>131</sup>                                                                                                                                                                                                                                                                                                                                                                                                                                                                                                                                                                                                                                                                                                                                                                                                                                                                                                                                                                                                                                                                                                                                                                                                                                                                                                                                                                                                                                                                                                                                                                                                                                                                                                                                                                                                                                                                                                                                                                                                                                                                                                                                                                                                                                                                                                                                                                                                                                                                                                                                                                                                                                                                                                                                                                                                                                                                                      | 11  | 0.563 |
| 1 | PV <sub>HSP</sub> N <sup>263</sup> , P <sup>451</sup> , G <sup>452</sup> , P <sup>453</sup> , G <sup>454</sup> , V <sup>455</sup> , R <sup>456</sup> , I <sup>457</sup> , L <sup>458</sup> , L <sup>459</sup> , I <sup>472</sup> , P <sup>474</sup> , N <sup>475</sup> , K <sup>476</sup> , A <sup>477</sup> , G <sup>478</sup> , P <sup>479</sup> , G <sup>480</sup> , P <sup>481</sup> , G <sup>482</sup> , E <sup>483</sup> , R <sup>484</sup> , I <sup>485</sup> , M <sup>486</sup> , K <sup>487</sup> , A <sup>488</sup> , Q <sup>489</sup> , A <sup>490</sup> , L <sup>491</sup> , A <sup>492</sup> , A <sup>493</sup> , Y <sup>494</sup> , F <sup>495</sup> , S <sup>496</sup> , K <sup>497</sup> , L <sup>498</sup> , F <sup>499</sup> , Y <sup>500</sup> , D <sup>501</sup> , T <sup>502</sup> , Y <sup>503</sup> , A <sup>504</sup> , A <sup>505</sup> , Y <sup>506</sup> , K <sup>507</sup> , L <sup>508</sup> , T <sup>509</sup> , V <sup>510</sup> , L <sup>511</sup> , N <sup>519</sup> , I <sup>526</sup> , I <sup>527</sup> , A <sup>528</sup> , A <sup>529</sup> , Y <sup>530</sup> , M <sup>531</sup> , S <sup>532</sup> , E <sup>533</sup> , E <sup>534</sup> , M <sup>535</sup> , N <sup>536</sup> , G <sup>537</sup> , E <sup>538</sup> , T <sup>539</sup> , A <sup>540</sup> , A <sup>541</sup> , Y <sup>542</sup> , Q <sup>543</sup> , L <sup>544</sup> , E <sup>545</sup> , F <sup>546</sup> , N <sup>560</sup> , T <sup>561</sup> , F <sup>562</sup> , Y <sup>563</sup> , A <sup>564</sup> , A <sup>565</sup> , Y <sup>566</sup> , L <sup>567</sup> , M <sup>568</sup> , S <sup>569</sup> , L <sup>570</sup> , I <sup>571</sup> , I <sup>572</sup> , N <sup>573</sup> , T <sup>574</sup> , F <sup>575</sup> , A <sup>576</sup> , A <sup>577</sup> , Y <sup>578</sup> , E <sup>579</sup> , T <sup>580</sup> , A <sup>581</sup> , L <sup>582</sup> , L <sup>583</sup> , S <sup>584</sup> , S <sup>585</sup> , G <sup>586</sup> , F <sup>587</sup> , A <sup>588</sup> , A <sup>589</sup> , Y <sup>590</sup> , V <sup>591</sup> , K <sup>592</sup> , D <sup>593</sup> , L <sup>594</sup> , V <sup>595</sup> , V <sup>596</sup> , L <sup>597</sup> , L <sup>598</sup> , A <sup>600</sup> , A <sup>601</sup> , Y <sup>602</sup> , M <sup>603</sup> , K <sup>604</sup> , N <sup>606</sup> , Q <sup>607</sup> , K <sup>608</sup> , Q <sup>609</sup> , I <sup>610</sup> , Y <sup>611</sup> , A <sup>612</sup> , A <sup>613</sup> , Y <sup>614</sup> , G <sup>617</sup> , T <sup>618</sup> , K <sup>619</sup> , I <sup>620</sup> , T <sup>621</sup> , L <sup>622</sup> , Y <sup>623</sup> , A <sup>624</sup> , A <sup>625</sup> , Y <sup>626</sup> , Y <sup>627</sup> , T <sup>629</sup> , T <sup>655</sup> , A <sup>657</sup> , F <sup>659</sup> , A <sup>660</sup> , Y <sup>662</sup> , S <sup>663</sup> , S <sup>664</sup> , S <sup>665</sup> , Q <sup>666</sup> , A <sup>667</sup> , S <sup>668</sup> , I <sup>669</sup> , E <sup>670</sup> , I <sup>671</sup> , H <sup>672</sup> , H <sup>673</sup> , H <sup>674</sup> , H <sup>675</sup> , H <sup>676</sup> , H <sup>677</sup> | 156 | 0.734 |
| 2 | V <sup>54</sup> , E <sup>55</sup> , A <sup>56</sup> , A <sup>57</sup> , E <sup>58</sup> , E <sup>59</sup> , Q <sup>60</sup> , S <sup>61</sup> , E <sup>62</sup> , F <sup>63</sup> , D <sup>64</sup> , V <sup>65</sup> , I <sup>66</sup> , L <sup>67</sup> , E <sup>68</sup> , A <sup>69</sup> , A <sup>70</sup> , G <sup>71</sup> , D <sup>72</sup> , K <sup>73</sup> , K <sup>74</sup> , I <sup>75</sup> , G <sup>76</sup> , V <sup>77</sup> , I <sup>78</sup> , K <sup>94</sup> , D <sup>95</sup> , V <sup>97</sup> , D <sup>98</sup> , G <sup>99</sup> , A <sup>100</sup> , P <sup>101</sup> , K <sup>102</sup> , P <sup>103</sup> , L <sup>104</sup> , L <sup>105</sup> , K <sup>107</sup> , A <sup>109</sup> , K <sup>110</sup> , A <sup>113</sup> , D <sup>114</sup> , A <sup>116</sup> , K <sup>117</sup> , A <sup>118</sup> , K <sup>119</sup> , L <sup>120</sup> , E <sup>121</sup> , A <sup>122</sup> , A <sup>123</sup> , G <sup>124</sup> , A <sup>125</sup> , T <sup>126</sup> , V <sup>127</sup> , T <sup>128</sup> , V <sup>129</sup> , K <sup>130</sup> , E <sup>131</sup> , A <sup>132</sup> , A <sup>133</sup> , A <sup>134</sup> , K <sup>135</sup> , P <sup>136</sup> , P <sup>137</sup> , K <sup>138</sup> , A <sup>139</sup> , E <sup>140</sup> , P <sup>141</sup> , A <sup>142</sup> , K <sup>143</sup> , E <sup>144</sup> , P <sup>145</sup> , E <sup>146</sup> , K <sup>147</sup> , G <sup>148</sup> , S <sup>149</sup> , D <sup>150</sup> , G <sup>151</sup> , Q <sup>152</sup> , K <sup>153</sup> , G <sup>154</sup> , E <sup>155</sup> , G <sup>156</sup> , P <sup>157</sup> , G <sup>158</sup> , P <sup>159</sup> , G <sup>160</sup> , E <sup>161</sup> , T <sup>162</sup> , D <sup>163</sup> , D <sup>164</sup> , T <sup>165</sup> , K <sup>166</sup> , G <sup>167</sup> , G <sup>168</sup> , P <sup>169</sup> , G <sup>170</sup> , P <sup>171</sup> , G <sup>172</sup> , N <sup>173</sup> , E <sup>175</sup> , K <sup>176</sup> , E <sup>177</sup> , N <sup>179</sup> , T <sup>180</sup> , N <sup>181</sup> , A <sup>182</sup> , P <sup>183</sup> , S <sup>184</sup>                                                                                                                                                                                                                                                                                                                                                                                                                                                                                                                                                                                                                                                                                                                                                                                                                                                                                                                                                                                                 | 108 | 0.72  |
| 3 | M <sup>1</sup> , A <sup>2</sup> , K <sup>3</sup> , L <sup>4</sup> , S <sup>5</sup> , T <sup>6</sup> , D <sup>7</sup> , E <sup>8</sup> , L <sup>9</sup> , L <sup>10</sup> , D <sup>11</sup> , A <sup>12</sup> , F <sup>13</sup> , K <sup>14</sup> , E <sup>15</sup> , M <sup>16</sup> , T <sup>17</sup> , L <sup>18</sup> , L <sup>19</sup> , E <sup>20</sup> , L <sup>21</sup> , S <sup>22</sup> , D <sup>23</sup> , V <sup>25</sup> , K <sup>26</sup> , K <sup>27</sup> , E <sup>29</sup> , E <sup>30</sup> , A <sup>32</sup> , E <sup>33</sup> , V <sup>34</sup> , T <sup>35</sup> , A <sup>36</sup> , A <sup>37</sup> , A <sup>38</sup> , P <sup>39</sup> , V <sup>40</sup> , R <sup>221</sup> , G <sup>285</sup> , P <sup>286</sup> , G <sup>287</sup> , D <sup>288</sup> , D <sup>289</sup> , G <sup>299</sup> , G <sup>300</sup> , E <sup>301</sup> , I <sup>302</sup> , E <sup>303</sup> , D <sup>304</sup> , V <sup>305</sup> , G <sup>306</sup> , E <sup>307</sup> , G <sup>308</sup> , P <sup>309</sup> , G <sup>310</sup> , P <sup>311</sup> , G <sup>312</sup> , K <sup>313</sup> , K <sup>314</sup> , D <sup>315</sup> , E <sup>316</sup> , D <sup>317</sup> , K <sup>318</sup> , E <sup>319</sup> , K <sup>321</sup> , A <sup>329</sup> , V <sup>330</sup> , K <sup>331</sup> , H <sup>332</sup> , S <sup>334</sup> , G <sup>337</sup> , Q <sup>338</sup> , R <sup>342</sup> , A <sup>343</sup> , L <sup>344</sup> , L <sup>345</sup> , G <sup>363</sup> , P <sup>364</sup> , G <sup>365</sup> , M <sup>366</sup> , P <sup>367</sup> , G <sup>368</sup> , G <sup>369</sup> , P <sup>371</sup> , S <sup>372</sup> , G <sup>373</sup> , A <sup>374</sup> , P <sup>375</sup> , G <sup>376</sup> , A <sup>377</sup> , G <sup>378</sup> , S <sup>379</sup> , T <sup>380</sup> , G <sup>381</sup> , G <sup>382</sup> , G <sup>383</sup> , P <sup>384</sup> , T <sup>385</sup> , G <sup>386</sup> , P <sup>387</sup> , G <sup>388</sup> , K <sup>391</sup> , S <sup>392</sup>                                                                                                                                                                                                                                                                                                                                                                                                                                                                                                                                                                                                                                                                                                                                                                                                                                                                                                                                                                                                                                                                                                                | 103 | 0.656 |

**Table 6.** Promiscuous epitopes of multiepitope vaccine constructs

|                   |        |                                                                                                                                                                                                                                                                                                                                                                                                                                                                                                                                                                                                                                                                                                                                                                                                                                                                                                                                                                                                                                                                                                                                                                                                              |
|-------------------|--------|--------------------------------------------------------------------------------------------------------------------------------------------------------------------------------------------------------------------------------------------------------------------------------------------------------------------------------------------------------------------------------------------------------------------------------------------------------------------------------------------------------------------------------------------------------------------------------------------------------------------------------------------------------------------------------------------------------------------------------------------------------------------------------------------------------------------------------------------------------------------------------------------------------------------------------------------------------------------------------------------------------------------------------------------------------------------------------------------------------------------------------------------------------------------------------------------------------------|
| PV <sub>HSP</sub> | HLA-A1 | MAKLSTDELLDAFKEMTLLELSDFVKKFEETFVTAAPVAVAAAGAAPAGA <b>AVEAAE</b><br>EQSEFDVILEAAGDKKIGVIKVVREIVSGLGLKEAKDLVDGAPKPLLEKV <b>AKEAADEAK</b><br>AKLEAAGATVTVKEAAAKPPKAEPAPKEPEK <b>GSDGQKGE</b> GPGETDDTKGGPGPNQE<br>KEENTNAPSNDVVLPG <b>PGPGAAMK</b> CAILSPAFKVRDFSVKGGPGRVRILLTNLLRESGK<br>KAE <b>V</b> VGPGGAFTTRGRSMGVAARQQLNTNGPGPG <b>DEEEDKKEK</b> DKKGGPGGDDEAE<br>EGPGPGGEIED <b>V</b> GE <b>GP</b> PG <b>K</b> KDEDKEK <b>KE</b> GP <b>GLAVKHFS</b> VE <b>Q</b> LEFRALL <b>F</b> VGP <b>GP</b><br>SAGGMPGGGGPGMPGGMPGAPGAGSTGGGPTGGPGKSTAGDTHLGGEDFDNRMV<br>NGPGP <b>GAVITVPAY</b> FNDSQRQATKDSGPGGAILSPAF <b>KV</b> GP <b>GP</b> VRILL <b>TNLL</b> GP <b>GP</b> YI<br>KITPN <b>KAG</b> PG <b>GER</b> IMKA <b>QALAA</b> Y <b>FSKLFYD</b> TY <b>AA</b> Y <b>KLTV</b> LGATYA <b>AY</b> NTNIKNTIIAA<br>Y <b>M</b> SEEMNG <b>ETA</b> AY <b>Q</b> LEFRALL <b>FAAYMSLI</b> INTFY <b>AA</b> Y <b>LMSLI</b> INT <b>FA</b> AY <b>ETA</b> LL <b>SSG</b> FAA<br><b>YVKDLV</b> VLL <b>FAAYM</b> KEN <b>Q</b> KO <b>IY</b> AA <b>Y</b> TRGT <b>KIT</b> LY <b>AA</b> Y <b>MTDP</b> IDEYA <b>AY</b> YSD <b>N</b> Q <b>PG</b> VL<br>AA <b>Y</b> YT <b>N</b> IT <b>R</b> AR <b>FA</b> AY <b>SS</b> QA <b>SIEI</b> HHHHHH |
|                   | HLA-A2 | MAKLSTDELLDAFKEMTLLELSDFVKKFEETFVTAAPVAVAAAGAAPAGA <b>AVEAAE</b><br>EQSEFDVILEAAGDKKIGVIKVVREIVSGLGLKEAKDLVDGAPKPLLEKV <b>AKEAADEAK</b><br>AKLEAAGATVTVKEAAAKPPKAEPAPKEPEK <b>GSDGQKGE</b> GPGETDDTKGGPGPNQE                                                                                                                                                                                                                                                                                                                                                                                                                                                                                                                                                                                                                                                                                                                                                                                                                                                                                                                                                                                                 |

|                   |        |                                                                                                                                                                                                                                                                                                                                                                                                                                                                                                                                                                                                                                                                                                                                                                                                                                                                                                                                                                                                                                                                                                                                                                                                                                                                                                                   |
|-------------------|--------|-------------------------------------------------------------------------------------------------------------------------------------------------------------------------------------------------------------------------------------------------------------------------------------------------------------------------------------------------------------------------------------------------------------------------------------------------------------------------------------------------------------------------------------------------------------------------------------------------------------------------------------------------------------------------------------------------------------------------------------------------------------------------------------------------------------------------------------------------------------------------------------------------------------------------------------------------------------------------------------------------------------------------------------------------------------------------------------------------------------------------------------------------------------------------------------------------------------------------------------------------------------------------------------------------------------------|
|                   |        | KEENTNAPSNDV <a href="#">VLPGGPGA</a> AMKC <a href="#">AILSPAFK</a> VRDFS VKGPGPGRVRILLTNLLRESGK<br>KAEVGPFGAFTTRGRSMGVAARQQLNTNGPFGDEEEDKKEKDKKGGPGDDEAE<br>EGPFGGEIEDVGEFGPGKKDEDKEKKEGPG <a href="#">GLAVKHFSV</a> <a href="#">EQLEFRALLFV</a> GPGPG<br>SAGMPGGGPGMPG <a href="#">GMPGAPGA</a> GSTGGGPTGPGPKSTAGDTHLGGEDFDNRMV<br>NGPFGAVITVPAFYFNSQRQATKDSGPG <a href="#">AILSPAFK</a> VGPFGVRILLTNLLGPGGYI<br>KITPNKAGPGERIMKAQ <a href="#">ALAAFYSKLFYDTYAA</a> YKLTVLGATYAA YNTNIKNTIIAA<br>YMSEEMNGET <a href="#">AAYQLEFRALLFAAYMSLIINTFYAAYLMSLIINTFAAYET</a> <a href="#">ALLSSGFAA</a><br>YVK <a href="#">DLVLLFAAYMKE</a> NQKQIYAA YTRGTK <a href="#">ITLYAAYYM</a> TDPIDEYAA YSDNQPGV<br><a href="#">AAYTNITRARFAA</a> YSSSQASIEIH HHHHH                                                                                                                                                                                                                                                                                                                                                                                                                                                                                                                                                             |
| HLA-<br>A*0201    |        | MAKLSTDELLDAFKEM <a href="#">TLELSDFV</a> KKFEETFEVTAAPVAVAAAGAAPAGAAVEAAE<br>EQ <a href="#">SEFDVILEAAGDKKIGV</a> IKVVREIVSGL <a href="#">GLKEAKDL</a> VDGAPKPLEKVAKEAADEAK<br>A <a href="#">KLEAAGATV</a> TVKEAAAKPPKAEP AKEPEKGS DGQKGEFGPGETDDTKGGPGPNQE<br>KEENTNAPSNDV <a href="#">VLPGGPGA</a> AMKC <a href="#">AILSPAFK</a> VRDFS VKGPGPGRVRILLTNLLRESGK<br>KAEVGPFGAFTTRGRSMGVAARQQLNTNGPFGDEEEDKKEKDKKGGPGDDEAE<br>EGPFGGEIEDVGEFGPGKKDEDKEKKEGPG <a href="#">GLAVKHFSV</a> <a href="#">EQLEFRALLFV</a> GPGPG<br>SAGMPGGGPGMPG <a href="#">GMPGAPGA</a> GSTGGGPTGPGPKSTAGDTHLGGEDFDNRMV<br>NGPFGAVITVPAFYFNSQRQATKDSGPG <a href="#">AILSPAFK</a> VGPFGVRILLTNLLGPGGYI<br>KITPNKAGPGERIMKAQ <a href="#">ALAAFYSKLFYDTYAA</a> YKLTVLGATYAA YNTNIKNTIIAA<br>YMSEEMNGET <a href="#">AAYQLEFRALLFAAYMSLIINTFYAAYLMSLIINTFAAYET</a> <a href="#">ALLSSGFAA</a><br>YVK <a href="#">DLVLLFAAYMKE</a> NQKQIYAA YTRGTK <a href="#">ITLYAAYYM</a> TDPIDEYAA YSDNQPGV<br><a href="#">AAYTNITRARFAA</a> YSSSQASIEIH HHHHH                                                                                                                                                                                                                                                                                             |
| HLA-<br>A*0205    |        | MAKLSTDELLDAFKEM <a href="#">TLELSDFV</a> KKFEETFEVTAAPVAVAAAGAAPAGAAVEAAE<br>EQ <a href="#">SEFDVILEAAGDKKIGV</a> IKVVREIVSGL <a href="#">GLKEAKDL</a> VDGAPKPLEKVAKEAADEAK<br>A <a href="#">KLEAAGATV</a> TVKEAAAKPPKAEP AKEPEKGS DGQKGEFGPGETDDTKGGPGPNQE<br>KEENTNAPSNDV <a href="#">VLPGGPGA</a> AMKC <a href="#">AILSPAFK</a> VRDFS VKGPGPGRVRILLTNLLRESGK<br>KAEVGPFGAFTTRGRSMGVAARQQLNTNGPFGDEEEDKKEKDKKGGPGDDEAE<br>EGPFGGEIEDVGEFGPGKKDEDKEKKEGPG <a href="#">GLAVKHFSV</a> <a href="#">EQLEFRALLFV</a> GPGPG<br><a href="#">SAGMPGGGPGMPGMPGMPGAPGAGSTGGGPTGPGPKSTAGDTHLGGEDFDNRMV</a><br><a href="#">NGPFGAVITVPAFYFNSQRQATKDSGPGAILSPAFK</a> VGPFGVRILLTNLLGPGGYI<br>KITPNKAGPGERIMKAQ <a href="#">ALAAFYSKLFYDTYAA</a> YKLTVLGATYAA YNTNIKNTIIAA<br>YMSEEMNGET <a href="#">AAYQLEFRALLFAAYMSLIINTFYAAYLMSLIINTFAAYET</a> <a href="#">ALLSSGFAA</a><br>YVK <a href="#">DLVLLFAAYMKE</a> NQKQIYAA YTRGTK <a href="#">ITLYAAYYM</a> TDPIDEYAA YSDNQPGV<br><a href="#">AAYTNITRARFAA</a> YSSSQASIEIH HHHHH                                                                                                                                                                                                                                                                                              |
| PV <sub>HSP</sub> | HLA-A1 | MAKLSTDELLDAFKEM <a href="#">TLELSDFV</a> KKFEETFEVTAAPVAVAAAGAAPAGAAVEAAE<br>EQ <a href="#">SEFDVILEAAGDKKIGV</a> IKVVREIVSGL <a href="#">GLKEAKDL</a> VDGAPKPLEKVAKEAADEAK<br>A <a href="#">KLEAAGATV</a> TVKEAAAKNSYGPFGNTGPGVGVKGLRILAFGPGPFPIRGLAEGPG<br>PGDDGGPGPLRGDAGVS <a href="#">GGPGPGIIF</a> YQQSGSGSITIGPGPGSGSVSGLTGPFGPGLH<br>GFH <a href="#">GPGPGVHGY</a> GDQTPGPGNGCTSAGDHYGPGPNPFGKTHGGGPGPGPNDRIKH<br><a href="#">GDLGNIVA</a> GANGGPGDILKRGPLSVIGHSLVHAGPFGANDDLQGGGPGPGTGNM<br>REESLKTGNAGSR <a href="#">LACGPGPGY</a> EFTVKDIGPFGN <a href="#">GVDVSLEKY</a> RGHVCLIV <a href="#">NVGPGPG</a><br><a href="#">CKSGATDKNYRQLQEMHTRLGPGPNQFGGQEP</a> <a href="#">WAEAEIGPGPKK</a> FVTEKYGVQFD<br><a href="#">MFSKIKGPGPFLKSRQHGTLTNNIKWNFSKGPGVNGSDADDLYK</a> GPFGFLKSRQH<br>GTLTNNIKWNFSK <a href="#">GPGPGQPVK</a> RYSP <a href="#">TTAPYDIEG</a> DIMGPGPIRLVLVDQGIKFTDGP<br>GPGDRIN <a href="#">ASDWPSMKS</a> HFHFGQGPGLPCLYDGDHIVQSG <a href="#">GPGGAILRHL</a> AGPGPG<br><a href="#">RKHNLNGGNELETT</a> HIDGPGPM <a href="#">FCEGVRDLHTKYTKMIY</a> QAGPG <a href="#">GILPVELAK</a> FE <a href="#">GPG</a><br><a href="#">GPGCLDKFPLL</a> KAYHQRMEDRPGPGPKLLATRDGPGPGDGN <a href="#">FILGEKISYVDFVLF</a><br><a href="#">EGPGPGIYAA</a> <a href="#">YVAEVYAA</a> YAAAYAYDTEKDSYAA YHHHHHH |
|                   | HLA-A2 | MAKLSTDELLDAFKEM <a href="#">TLELSDFV</a> KKFEETFEVTAAPVAVAAAGAAPAGAAVEAAE<br>EQ <a href="#">SEFDVILEAAGDKKIGV</a> IKVVREIVSGL <a href="#">GLKEAKDL</a> VDGAPKPLEKVAKEAADEAK<br>A <a href="#">KLEAAGATV</a> TVKEAAA KNSYGPFGNTGPGVGVKGLRILAFGPGPFPIRGLAEGPG<br>PGDDGGPGPLRGDAGVSGGPGPGIIFYQQSGSGSITIGPGPGSGSVSGLTGPFGPGLH                                                                                                                                                                                                                                                                                                                                                                                                                                                                                                                                                                                                                                                                                                                                                                                                                                                                                                                                                                                         |



|       |                          |       |           |       |       |       |       |         |
|-------|--------------------------|-------|-----------|-------|-------|-------|-------|---------|
| seq13 | NGVDVSLEKYRGHVC<br>LIVNV | -1.05 | Non-Toxin | -0.06 | 0.35  | -0.20 | 0.50  | 2214.88 |
| seq14 | CKSGATDKNYRQLQE<br>MHTRL | -0.29 | Non-Toxin | -0.42 | -1.38 | 0.44  | 2.50  | 2379.99 |
| seq15 | NQFGGQEPWAEAEI           | -0.94 | Non-Toxin | -0.10 | -0.96 | 0.06  | -3.00 | 1575.86 |
| seq16 | KKFVTEKYGVQFDMFS<br>KIK  | -1.25 | Non-Toxin | -0.20 | -0.53 | 0.27  | 3.00  | 2324.06 |
| seq17 | VNGSDADDLYK              | -0.68 | Non-Toxin | -0.24 | -0.96 | 0.58  | -2.00 | 1196.38 |
| seq18 | FLKSRQHGTLTNNIKW<br>NFSK | -1.52 | Non-Toxin | -0.27 | -1.00 | -0.09 | 4.50  | 2420.08 |
| seq19 | QPVKRYSPPTAPYDIEG<br>DIM | -0.75 | Non-Toxin | -0.19 | -0.77 | 0.16  | -1.00 | 2281.85 |
| seq2  | IIFYQQGSGGSITTI          | -1.53 | Non-Toxin | 0.12  | 0.55  | -0.79 | 0.00  | 1585.03 |
| seq20 | PIRLVLVDQGIKFTD          | -0.99 | Non-Toxin | -0.06 | 0.41  | -0.06 | 0.00  | 1714.27 |
| seq21 | DRINASDWPSMKSHFH<br>FGQ  | -1.02 | Non-Toxin | -0.23 | -1.07 | 0.02  | 1.00  | 2260.74 |
| seq22 | LPCLYDGDHQIVQSG          | 0.24  | Non-Toxin | -0.06 | -0.19 | -0.27 | -1.50 | 1645.05 |
| seq23 | AILRHLA                  | -0.96 | Non-Toxin | 0.02  | 1.14  | -0.56 | 1.50  | 793.08  |
| seq24 | RKHNLNGGNELETHI<br>D     | -0.95 | Non-Toxin | -0.34 | -1.52 | 0.49  | 0.00  | 1948.35 |
| seq25 | MFCEGVRDLHTKYTK<br>MIYQA | -0.76 | Non-Toxin | -0.17 | -0.35 | -0.12 | 1.50  | 2435.17 |
| seq26 | ILPVELAKFE               | -0.79 | Non-Toxin | 0.08  | 0.84  | -0.09 | -1.00 | 1158.55 |
| seq27 | KLLATRD                  | -0.80 | Non-Toxin | -0.35 | -0.46 | 0.64  | 1.00  | 816.06  |
| seq28 | DGKNFILGEKISYVDFV<br>LFE | -1.66 | Non-Toxin | -0.00 | 0.26  | -0.07 | -2.00 | 2333.97 |
| seq29 | CLDKFPLLKAYHQRME<br>DRPG | -1.02 | Non-Toxin | -0.30 | -0.93 | 0.39  | 1.50  | 2418.12 |
| seq3  | SGSVSGLT                 | -0.93 | Non-Toxin | 0.05  | 0.51  | -0.35 | 0.00  | 706.86  |
| seq4  | PGLHGFH                  | -0.84 | Non-Toxin | 0.08  | -0.31 | -0.76 | 1.00  | 763.96  |
| seq5  | VHQYGDQT                 | -0.63 | Non-Toxin | -0.24 | -1.49 | -0.16 | -0.50 | 947.09  |
| seq6  | NGCTSAGDHY               | -0.69 | Non-Toxin | -0.16 | -0.95 | -0.12 | -0.50 | 1024.16 |
| seq7  | NPF GKTHGG               | -0.86 | Non-Toxin | -0.14 | -1.26 | -0.02 | 1.50  | 914.12  |
| seq8  | PNDRIKHIGDLGNIVAG<br>ANG | -1.16 | Non-Toxin | -0.11 | -0.36 | 0.12  | 0.50  | 2031.57 |
| seq9  | DIKLRGPLSVIGHSLVV<br>HA  | -1.07 | Non-Toxin | 0.01  | 0.66  | -0.28 | 2.00  | 2011.70 |

#### MHC-I toxicity

|      |            |       |           |       |       |       |       |         |
|------|------------|-------|-----------|-------|-------|-------|-------|---------|
| seq1 | VAEVYINSY  | -0.88 | Non-Toxin | 0.06  | 0.48  | -0.71 | -1.00 | 1057.29 |
| seq2 | DAGVSGIY   | -1.35 | Non-Toxin | 0.18  | 0.96  | -0.51 | -1.00 | 894.12  |
| seq3 | MTAIKADDY  | -1.02 | Non-Toxin | -0.13 | -0.32 | 0.24  | -1.00 | 1027.27 |
| seq4 | LTNSNYTEL  | -1.12 | Non-Toxin | -0.16 | -0.71 | -0.33 | -1.00 | 1054.25 |
| seq5 | GKDV SLEKY | -1.08 | Non-Toxin | -0.28 | -1.03 | 0.74  | 0.00  | 1038.29 |
| seq6 | YTKMIYQAY  | -0.95 | Non-Toxin | -0.07 | -0.42 | -0.86 | 1.00  | 1180.51 |
| seq7 | HTKYTKMIY  | -1.14 | Non-Toxin | -0.21 | -0.96 | -0.33 | 2.50  | 1184.55 |
| seq8 | FTDDRINAS  | -1.07 | Non-Toxin | -0.30 | -0.82 | 0.48  | -1.00 | 1038.19 |
| seq9 | AYDTEKDSY  | -1.12 | Non-Toxin | -0.37 | -1.86 | 0.76  | -2.00 | 1091.20 |

#### MHC class II

|      |           |       |           |       |       |      |      |         |
|------|-----------|-------|-----------|-------|-------|------|------|---------|
| seq1 | KNFILGEKI | -1.29 | Non-Toxin | -0.08 | 0.04  | 0.14 | 1.00 | 1061.43 |
| seq2 | DIKLRGPLS | -1.04 | Non-Toxin | -0.22 | -0.29 | 0.43 | 1.00 | 998.32  |

|                                             |                           |       |           |       |       |       |       |         |
|---------------------------------------------|---------------------------|-------|-----------|-------|-------|-------|-------|---------|
| seq3                                        | PLSVIGHSL                 | -0.88 | Non-Toxin | 0.17  | 1.06  | -0.76 | 0.50  | 922.23  |
| seq4                                        | LSVIGHSLV                 | -0.96 | Non-Toxin | 0.23  | 1.70  | -0.92 | 0.50  | 924.25  |
| <b>PV<sub>HSP</sub> toxicity prediction</b> |                           |       |           |       |       |       |       |         |
| <b>B- cell epitopes</b>                     |                           |       |           |       |       |       |       |         |
| seq1                                        | AFTTRGRSMGVAARQQ<br>LNTN  | -1.09 | Non-Toxin | -0.29 | -0.66 | 0.01  | 3.00  | 2179.73 |
| seq2                                        | RVRILLTNLLRESGKKA<br>EEV  | -1.19 | Non-Toxin | -0.30 | -0.36 | 0.58  | 2.00  | 2325.06 |
| seq3                                        | AAMKCAILSPAFAKVRD<br>FSVK | -1.07 | Non-Toxin | -0.08 | 0.55  | -0.01 | 3.00  | 2182.94 |
| seq4                                        | ETDDTKG                   | -0.98 | Non-Toxin | -0.48 | -2.31 | 1.60  | -2.00 | 764.83  |
| seq5                                        | NQEKEENTNAPSNDVV<br>LP    | -0.83 | Non-Toxin | -0.31 | -1.45 | 0.59  | -3.00 | 1998.35 |
| seq6                                        | PPKAEPAKEPEKGSDDG<br>QKGE | -0.34 | Non-Toxin | -0.39 | -2.07 | 1.32  | -1.00 | 2079.53 |
| seq7                                        | DDEAESEE                  | -0.81 | Non-Toxin | -0.52 | -2.74 | 2.50  | -6.00 | 835.81  |
| seq8                                        | KKDEDEKKEKE               | -0.71 | Non-Toxin | -0.88 | -3.70 | 3.00  | 0.00  | 1276.54 |
| seq9                                        | GEIEDVGE                  | -0.93 | Non-Toxin | -0.12 | -0.76 | 1.09  | -4.00 | 846.96  |
| seq10                                       | DEEEDKKEKDKK              | -0.90 | Non-Toxin | -0.85 | -3.67 | 3.00  | -2.00 | 1520.77 |
| seq11                                       | LAVKHFSVEGQLEFRA<br>LLFV  | -1.39 | Non-Toxin | 0.04  | 0.82  | -0.41 | 0.50  | 2304.04 |
| seq12                                       | SAGGMPGG                  | -1.03 | Non-Toxin | 0.10  | -0.04 | -0.19 | 0.00  | 632.80  |
| seq13                                       | MPGGMPGAPGAGSTG<br>GGPT   | -1.49 | Non-Toxin | 0.06  | -0.26 | -0.19 | 0.00  | 1644.10 |
| seq14                                       | KSTAGDTHLGGEDFDN<br>RMVN  | -1.18 | Non-Toxin | -0.26 | -1.08 | 0.49  | -1.50 | 2164.58 |
| seq15                                       | AVITVPAYFNDSQRQA<br>TKDS  | -1.76 | Non-Toxin | -0.20 | -0.54 | 0.06  | 0.00  | 2211.69 |
| <b>MHC class-I epitope</b>                  |                           |       |           |       |       |       |       |         |
| seq1                                        | FSKLFYDTY                 | -0.67 | Non-Toxin | -0.05 | -0.23 | -0.61 | 0.00  | 1183.44 |
| seq2                                        | KLTVLGATY                 | -0.70 | Non-Toxin | 0.06  | 0.73  | -0.63 | 1.00  | 965.29  |
| seq3                                        | NTNIKNTII                 | -0.80 | Non-Toxin | -0.13 | -0.26 | -0.29 | 1.00  | 1030.33 |
| seq4                                        | MSEEMNGET                 | -0.73 | Non-Toxin | -0.25 | -1.34 | 0.72  | -3.00 | 1027.21 |
| seq5                                        | QLEFRALLF                 | -1.18 | Non-Toxin | -0.00 | 0.81  | -0.52 | 0.00  | 1136.49 |
| seq6                                        | MSLIINTFY                 | -1.19 | Non-Toxin | 0.20  | 1.24  | -1.27 | 0.00  | 1101.46 |
| seq7                                        | LMSLIINTF                 | -1.01 | Non-Toxin | 0.26  | 1.81  | -1.21 | 0.00  | 1051.45 |
| seq8                                        | ETALLSSGF                 | -0.56 | Non-Toxin | 0.08  | 0.67  | -0.38 | -1.00 | 924.14  |
| seq9                                        | VKDLVLLF                  | -1.35 | Non-Toxin | 0.22  | 2.16  | -0.71 | 0.00  | 1045.47 |
| seq10                                       | MKENQKQIY                 | -0.93 | Non-Toxin | -0.43 | -1.86 | 0.47  | 1.00  | 1181.51 |
| seq11                                       | TRGTKITLY                 | -1.20 | Non-Toxin | -0.22 | -0.43 | -0.12 | 2.00  | 1052.37 |
| seq12                                       | YMTDPIDEY                 | -0.77 | Non-Toxin | -0.14 | -1.00 | 0.10  | -3.00 | 1146.35 |
| seq13                                       | YSDNQPGVL                 | -1.57 | Non-Toxin | -0.13 | -0.73 | -0.21 | -1.00 | 992.18  |
| seq14                                       | YTNITRARF                 | -0.81 | Non-Toxin | -0.32 | -0.68 | -0.19 | 2.00  | 1141.41 |
| seq15                                       | SSSQASIEI                 | -0.89 | Non-Toxin | -0.07 | 0.07  | 0.03  | -1.00 | 921.09  |
| <b>MHC class-II epitope</b>                 |                           |       |           |       |       |       |       |         |
| seq1                                        | YKITPNKA                  | -1.00 | Non-Toxin | -0.15 | -0.46 | -0.07 | 2.00  | 1047.39 |
| seq2                                        | ERIMKAQAL                 | -1.45 | Non-Toxin | -0.24 | -0.18 | 0.37  | 1.00  | 1059.42 |
| seq3                                        | AILSPAFAKV                | -1.05 | Non-Toxin | 0.16  | 1.40  | -0.59 | 1.00  | 945.29  |
| seq4                                        | VRILLTNLL                 | -1.31 | Non-Toxin | 0.09  | 1.69  | -0.86 | 1.00  | 1054.49 |



**Table 8.** Residues pair selected for disulfide engineering.

| <b>Res1 Seq #</b> | <b>Res1 AA</b> | <b>Res2 Seq #</b> | <b>Res2 AA</b> | <b><math>\chi^3</math></b> | <b>Energy</b> | <b>Sum B-Factors</b> |
|-------------------|----------------|-------------------|----------------|----------------------------|---------------|----------------------|
| 28                | PHE            | 37                | ALA            | 111.66                     | 3.37          | 19.65                |
| 29                | GLU            | 37                | ALA            | -99.5                      | 4.45          | 19.67                |
| 64                | ASP            | 129               | VAL            | 118.32                     | 4.92          | 19.11                |
| 68                | GLU            | 127               | VAL            | 116.39                     | 4.19          | 19.7                 |
| 71                | GLY            | 72                | ASP            | -105.29                    | 3.97          | 23.35                |
| 76                | GLY            | 123               | ALA            | 80.13                      | 1.32          | 19.25                |
| 89                | GLY            | 92                | GLU            | 81.62                      | 1.74          | 19.51                |
| 108               | VAL            | 112               | ALA            | -106.12                    | 3.27          | 20.1                 |
| 152               | GLN            | 154               | GLY            | 93.03                      | 2.66          | 26.31                |
| 158               | GLY            | 160               | GLY            | -91.92                     | 5.63          | 29.98                |
| 170               | GLY            | 174               | GLN            | -88.46                     | 5.25          | 26.41                |
| 186               | ASP            | 415               | GLY            | -114.11                    | 5.13          | 18.91                |
| 188               | VAL            | 209               | VAL            | 116.11                     | 3.13          | 19.09                |
| 191               | GLY            | 641               | ASP/           | -57.31                     | 6.28          | 19.18                |
| 194               | PRO            | 277               | LYS            | -90.95                     | 1.25          | 19.05                |
| 194               | PRO            | 278               | GLU            | -114.89                    | 4.79          | 19.04                |
| 200               | CYS            | 637               | ALA            | 122.13                     | 3.56          | 18.89                |
| 202               | ILE            | 641               | ASP            | -62.28                     | 4.73          | 19.12                |
| 203               | LEU            | 208               | LYS            | 85.1                       | 5.1           | 19.48                |
| 208               | LYS            | 405               | ASP            | 72.13                      | 4.34          | 19.55                |
| 210               | ARG            | 405               | ASP            | -77.13                     | 5.87          | 19.14                |
| 213               | SER            | 395               | GLY            | 120                        | 5.18          | 21.45                |
| 215               | LYS            | 216               | GLY            | -99.84                     | 0.79          | 22.26                |
| 216               | GLY            | 217               | PRO            | 107.45                     | 1.73          | 23.71                |
| 225               | LEU            | 407               | ARG            | 72.08                      | 1.9           | 19.05                |
| 232               | GLU            | 256               | VAL            | -109.56                    | 5.49          | 21.45                |
| 242               | PRO            | 259               | ARG            | 113.48                     | 1.85          | 18.9                 |
| 244               | PRO            | 258               | ALA            | 99.05                      | 1.08          | 18.96                |
| 244               | PRO            | 271               | ASP            | -92.18                     | 5.62          | 18.84                |
| 245               | GLY            | 275               | ASP            | -106.82                    | 3.78          | 19.2                 |
| 246               | ALA            | 258               | ALA            | 85.82                      | 0.71          | 19.04                |
| 276               | LYS            | 435               | SER            | 106.32                     | 3.03          | 19.12                |
| 283               | GLY            | 427               | SER            | 111.42                     | 6.5           | 19.04                |
| 286               | PRO            | 308               | GLY            | 90.92                      | 4.97          | 19.76                |
| 317               | ASP            | 382               | GLY            | -109.94                    | 2.59          | 25.49                |
| 324               | PRO            | 339               | LEU            | 109.67                     | 1.92          | 21.14                |
| 334               | SER            | 337               | GLY            | 111.13                     | 3.37          | 19.72                |
| 344               | LEU            | 378               | GLY            | 124.29                     | 3.52          | 23.44                |
| 357               | MET            | 359               | GLY            | 122.96                     | 6.84          | 21.64                |
| 378               | GLY            | 380               | THR            | -112.44                    | 3.55          | 26.66                |
| 416               | ALA            | 444               | SER            | -92.41                     | 2.63          | 18.99                |
| 421               | PRO            | 467               | PRO            | -104.78                    | 4.61          | 18.8                 |
| 423               | TYR            | 515               | TYR            | 83.01                      | 3.53          | 18.99                |
| 424               | PHE            | 428               | GLN            | 91.36                      | 4.05          | 18.89                |
| 448               | LYS            | 643               | GLN            | 93.6                       | 4.39          | 19.15                |
| 462               | LEU            | 469               | TYR            | 70.56                      | 6.76          | 19.07                |
| 468               | GLY            | 601               | ALA            | -62.85                     | 3.92          | 19.22                |
| 483               | GLU            | 487               | LYS            | 118.41                     | 4.59          | 20.1                 |

|     |     |     |     |         |      |       |
|-----|-----|-----|-----|---------|------|-------|
| 512 | GLY | 612 | ALA | -94.46  | 1.49 | 19.03 |
| 528 | ALA | 547 | ARG | 75.39   | 4.02 | 19.11 |
| 535 | MET | 543 | GLN | 119.58  | 6.45 | 19.13 |
| 541 | ALA | 575 | PHE | 126.32  | 6.26 | 19.36 |
| 541 | ALA | 577 | ALA | -77.58  | 7.04 | 19.55 |
| 553 | ALA | 558 | ILE | -116.66 | 7.32 | 18.98 |
| 571 | ILE | 577 | ALA | 81.75   | 0.72 | 19.56 |
| 597 | LEU | 604 | LYS | 125.94  | 5.4  | 19.22 |
| 629 | THR | 630 | ASP | -88.27  | 5.24 | 22.08 |
| 646 | VAL | 652 | THR | 114.51  | 3.65 | 19.22 |
| 659 | PHE | 676 | HIS | 107.41  | 5.44 | 19.83 |
| 660 | ALA | 675 | HIS | 96.61   | 4.39 | 19.59 |

---

**PVAO**


---

|     |     |     |     |         |      |   |
|-----|-----|-----|-----|---------|------|---|
| 6   | THR | 143 | GLY | 121.78  | 4.74 | 0 |
| 10  | LEU | 143 | GLY | 100.89  | 5.18 | 0 |
| 12  | ALA | 16  | MET | 99      | 1.21 | 0 |
| 16  | MET | 20  | GLU | 70.69   | 4.12 | 0 |
| 27  | LYS | 30  | GLU | 96.07   | 4.33 | 0 |
| 43  | ALA | 55  | GLU | -110.96 | 4.26 | 0 |
| 53  | ALA | 86  | SER | -76.27  | 3.94 | 0 |
| 56  | ALA | 58  | GLU | -80.58  | 3.24 | 0 |
| 65  | VAL | 76  | GLY | 80.18   | 5.17 | 0 |
| 83  | GLU | 89  | GLY | 67.16   | 7.26 | 0 |
| 97  | VAL | 115 | GLU | 116.57  | 3.2  | 0 |
| 99  | GLY | 100 | ALA | 117.18  | 5.97 | 0 |
| 121 | GLU | 161 | GLY | -71.83  | 3.87 | 0 |
| 137 | SER | 185 | PRO | -97.01  | 4.25 | 0 |
| 139 | GLY | 151 | VAL | -77.9   | 3.65 | 0 |
| 140 | PRO | 188 | ARG | -101.26 | 3.28 | 0 |
| 156 | ARG | 196 | GLY | -83.54  | 1.82 | 0 |
| 159 | ALA | 193 | VAL | -66.74  | 1.47 | 0 |
| 159 | ALA | 196 | GLY | 113.26  | 3.06 | 0 |
| 175 | PRO | 216 | GLY | 112.95  | 4.55 | 0 |
| 191 | ALA | 223 | SER | 88.21   | 3.1  | 0 |
| 194 | SER | 224 | VAL | 123.81  | 4.19 | 0 |
| 204 | PHE | 217 | PRO | 85.1    | 5.01 | 0 |
| 218 | GLY | 241 | GLY | -82.9   | 3.21 | 0 |
| 222 | GLY | 245 | GLY | -100.43 | 3.63 | 0 |
| 247 | HIS | 281 | GLY | -90.24  | 8.17 | 0 |
| 255 | PRO | 256 | GLY | 108.82  | 1.28 | 0 |
| 257 | PRO | 260 | GLY | 124.31  | 2.81 | 0 |
| 264 | ALA | 286 | PRO | -58.9   | 2.34 | 0 |
| 268 | TYR | 283 | GLY | -97.65  | 3.89 | 0 |
| 276 | PHE | 278 | LYS | -103.19 | 1.45 | 0 |
| 284 | PRO | 322 | VAL | -59.46  | 7.15 | 0 |
| 288 | PRO | 325 | HIS | -96.51  | 3.64 | 0 |
| 290 | ASP | 295 | ILE | 114.71  | 5.52 | 0 |
| 291 | ARG | 292 | ILE | 108.71  | 3.56 | 0 |
| 299 | GLY | 326 | SER | -101.11 | 5.77 | 0 |
| 310 | GLY | 348 | PRO | 119.93  | 4.11 | 0 |

|     |     |     |     |         |      |   |
|-----|-----|-----|-----|---------|------|---|
| 324 | GLY | 367 | LEU | 75.57   | 4.81 | 0 |
| 328 | VAL | 370 | GLY | -78.2   | 4.44 | 0 |
| 333 | PRO | 336 | GLY | -78.57  | 3.33 | 0 |
| 344 | GLY | 347 | GLY | -79.73  | 5.39 | 0 |
| 365 | SER | 403 | LEU | 104.31  | 0.28 | 0 |
| 372 | GLY | 379 | VAL | 99.66   | 5.79 | 0 |
| 383 | GLY | 404 | ILE | -86.34  | 2.99 | 0 |
| 386 | PRO | 396 | LYS | 104.63  | 1.19 | 0 |
| 386 | PRO | 398 | ARG | 93.17   | 1.63 | 0 |
| 391 | ASP | 395 | GLU | 125.17  | 6.97 | 0 |
| 393 | SER | 394 | LEU | -109.96 | 2.36 | 0 |
| 405 | VAL | 454 | GLY | -60.21  | 3.17 | 0 |
| 413 | CYS | 463 | LYS | -70.48  | 4.09 | 0 |
| 414 | LYS | 422 | TYR | 108.55  | 5.19 | 0 |
| 423 | ARG | 426 | GLN | -104.93 | 5.4  | 0 |
| 425 | LEU | 429 | HIS | -105.7  | 2.22 | 0 |
| 448 | GLU | 451 | ILE | 95.9    | 0.72 | 0 |
| 456 | GLY | 501 | GLY | 69.39   | 4.74 | 0 |
| 466 | VAL | 467 | GLN | 106.75  | 3.04 | 0 |
| 468 | PHE | 470 | MET | -114.38 | 4.31 | 0 |
| 496 | TRP | 542 | GLY | 87.2    | 2    | 0 |
| 533 | ASN | 573 | ILE | -95.93  | 3.86 | 0 |
| 557 | ALA | 558 | PRO | -69.01  | 4.98 | 0 |
| 610 | GLN | 611 | GLY | 108.94  | 3.62 | 0 |
| 620 | TYR | 623 | ASP | 123.66  | 8.38 | 0 |
| 645 | GLY | 656 | ASN | 76.84   | 2.46 | 0 |
| 647 | GLY | 653 | ASN | 106.22  | 4.07 | 0 |
| 650 | HIS | 653 | ASN | 86.64   | 1.96 | 0 |
| 668 | PRO | 704 | GLU | -94.47  | 5.78 | 0 |
| 673 | GLU | 674 | GLY | -110.51 | 1.28 | 0 |
| 675 | VAL | 713 | LYS | -83.32  | 1.6  | 0 |
| 686 | ILE | 720 | TYR | 85.05   | 4.25 | 0 |
| 692 | GLY | 695 | ILE | -88.71  | 5.42 | 0 |
| 693 | PRO | 731 | PRO | -95.35  | 1.13 | 0 |
| 699 | GLU | 739 | THR | -89.93  | 4.66 | 0 |
| 706 | PRO | 746 | GLY | -66.55  | 6.66 | 0 |
| 749 | LYS | 793 | THR | 89      | 2.7  | 0 |
| 750 | ASN | 751 | PHE | 124.48  | 7.62 | 0 |
| 753 | LEU | 789 | TYR | 110.87  | 0.84 | 0 |
| 773 | ILE | 778 | VAL | -89.43  | 4.33 | 0 |
| 793 | THR | 796 | ASP | -90.1   | 5.05 | 0 |

---

**Table 9.** Molecular docking of MEVs-TLR4 complexes showing H-bonds

| Vaccine           | Ligand | Interacting residues                                                                                                                                                                                                                                                                                                                                                                                                                                                                                                                                                                                                                                                                                                                                                                                                                                                                                                                                                                                                                                                                                                                                          |
|-------------------|--------|---------------------------------------------------------------------------------------------------------------------------------------------------------------------------------------------------------------------------------------------------------------------------------------------------------------------------------------------------------------------------------------------------------------------------------------------------------------------------------------------------------------------------------------------------------------------------------------------------------------------------------------------------------------------------------------------------------------------------------------------------------------------------------------------------------------------------------------------------------------------------------------------------------------------------------------------------------------------------------------------------------------------------------------------------------------------------------------------------------------------------------------------------------------|
| PV <sub>AO</sub>  | TLR4   | LYS <sup>119</sup> :HZ3 - GLN <sup>129</sup> :OE1, ASP <sup>792</sup> :HN - ASP <sup>95</sup> :OD1, GLN <sup>39</sup> :HE22 - THR <sup>145</sup> :O, ASN <sup>58</sup> :HD22 - GLU <sup>115</sup> :OE2, ASP <sup>95</sup> :HN - ASP <sup>792</sup> :OD2, GLN <sup>99</sup> :HE21 - PRO <sup>733</sup> :O, GLY <sup>120</sup> :HN - ALA <sup>788</sup> :O, GLN <sup>129</sup> :HE21 - LYS <sup>119</sup> :O, LEU <sup>19</sup> :HA - GLU <sup>27</sup> :OE1, VAL <sup>42</sup> :HA-GLN <sup>599</sup> :O, GLU <sup>121</sup> :HA - GLU <sup>154</sup> :OE1, GLY <sup>150</sup> :HA1 - ASP <sup>60</sup> :OD2, GLY <sup>200</sup> :HA2 - GLU <sup>266</sup> :OE1, GLY <sup>734</sup> :HA1 - GLN <sup>99</sup> :O, ASP <sup>792</sup> :HA - ASP <sup>95</sup> :OD2, PRO <sup>28</sup> :HA - LEU <sup>18</sup> :O, VAL <sup>30</sup> :HA - LEU <sup>21</sup> :O, GLY <sup>96</sup> :HA2 - ASP <sup>741</sup> :OD1, SER <sup>102</sup> :HB2-GLY <sup>730</sup> :O, SER <sup>123</sup> :HB2 - ALA <sup>784</sup> :O, LYS <sup>153</sup> :HE1 - LYS <sup>119</sup> :O, HIS <sup>179</sup> :HE1 - PHE <sup>160</sup> :O LEU <sup>600</sup> :HA - ALA <sup>41</sup> :O |
| PV <sub>HSP</sub> | TLT4   | LYS <sup>74</sup> :NZ - GLU <sup>266</sup> :OE2, LYS <sup>487</sup> :NZ - GLU <sup>27</sup> :OE1, LYS <sup>153</sup> :NZ - LEU <sup>269</sup> :O, GLY <sup>158</sup> :H - THR <sup>319</sup> :OG1, THR <sup>162</sup> :OG1 - SER <sup>317</sup> :OG, GLY <sup>373</sup> :H - ASN <sup>531</sup> :OD1, LYS <sup>497</sup> :NZ - VAL <sup>32</sup> :O, ARG <sup>264</sup> :NE - PRO <sup>159</sup> :O, ASN <sup>265</sup> :N - ASP <sup>153</sup> :OD1, THR <sup>319</sup> :OG1 - GLY <sup>158</sup> :O, HIS <sup>529</sup> :ND1 - PRO <sup>183</sup> :O, ASN <sup>531</sup> :ND2 - SER <sup>372</sup> :OG, SER <sup>552</sup> :OG - ASN <sup>181</sup> :OG1, LYS <sup>153</sup> :CE - GLU <sup>270</sup> :O, GLY <sup>352</sup> :CA - ASN <sup>579</sup> :O, SER <sup>353</sup> :CB - GLN <sup>578</sup> :OE1, GLY <sup>369</sup> :CA - HIS <sup>529</sup> :O, LYS <sup>487</sup> :CE - PRO <sup>28</sup> :O, SER <sup>317</sup> :CB - GLY <sup>160</sup> :O, HIS <sup>458</sup> :CE1 - GLU <sup>30</sup> :O, GLN <sup>507</sup> :CA - SER <sup>372</sup> :OG, HIS <sup>555</sup> :CE1 - ALA <sup>354</sup> :O                                                 |

**Table 10.** Details of immune simulation results of PV<sub>AO</sub> and PV<sub>HSP</sub> vaccine constructs

| S.N | Types of immune response                                                                        | PV <sub>AO</sub>                                              | PV <sub>HSP</sub>                                             |
|-----|-------------------------------------------------------------------------------------------------|---------------------------------------------------------------|---------------------------------------------------------------|
| 1   | Antigen count (I <sup>st</sup> dose)                                                            | Decrease to zero count after 5 <sup>th</sup> day of injection | Decrease to zero count after 5 <sup>th</sup> day of injection |
| 2   | Antigen count (II <sup>nd</sup> and III <sup>rd</sup> dose)                                     | Decrease to zero after 1 <sup>st</sup> day of injection       | Decrease to zero after 2 <sup>nd</sup> day of injection       |
| 3   | Antibody titers (IgG + IgM and IgG1 + IgG2)                                                     | Elicited high level of antibody titer                         | Elicited high level of antibody titer                         |
| 4   | Total B cell population per state at end of III <sup>rd</sup> dose (cells per mm <sup>3</sup> ) | 580                                                           | 500                                                           |
| 5   | Active B cell population at end of III <sup>rd</sup> dose (cells per mm <sup>3</sup> )          | 480                                                           | 320                                                           |
| 6   | Plasma B lymphocytes at end of III <sup>rd</sup> dose (IgG1)                                    | 9                                                             | 6                                                             |
| 7   | IFN- $\gamma$ (ng/ml)                                                                           | 4.3 $\times 10^5$                                             | 4.2 $\times 10^5$                                             |
| 8   | TGF- $\beta$ (ng/ml)                                                                            | 1.1 $\times 10^4$                                             | 7.5 $\times 10^4$                                             |
| 9   | IL-2 (ng/ml)                                                                                    | 3.0 $\times 10^5$                                             | 2.0 $\times 10^5$                                             |
| 10  | IL-10 (ng/ml)                                                                                   | 4 $\times 10^4$                                               | 4 $\times 10^4$                                               |
| 11  | IL-12 (ng/ml)                                                                                   | 2 $\times 10^3$                                               | 2 $\times 10^4$                                               |
| 11  | Memory T-helper lymphocytes count (cells, per mm <sup>3</sup> )                                 | 4000                                                          | - 3200                                                        |
| 13  | Active T-cytotoxic lymphocytes population                                                       | 2200                                                          | - 850                                                         |

|    |                                                                                              |     |     |
|----|----------------------------------------------------------------------------------------------|-----|-----|
| 14 | per state (cells per mm <sup>3</sup> )<br>Active macrophages<br>(cells per mm <sup>3</sup> ) | 100 | 100 |
| 15 | Macrophages presenting<br>(cells per mm <sup>3</sup> )                                       | 200 | 200 |

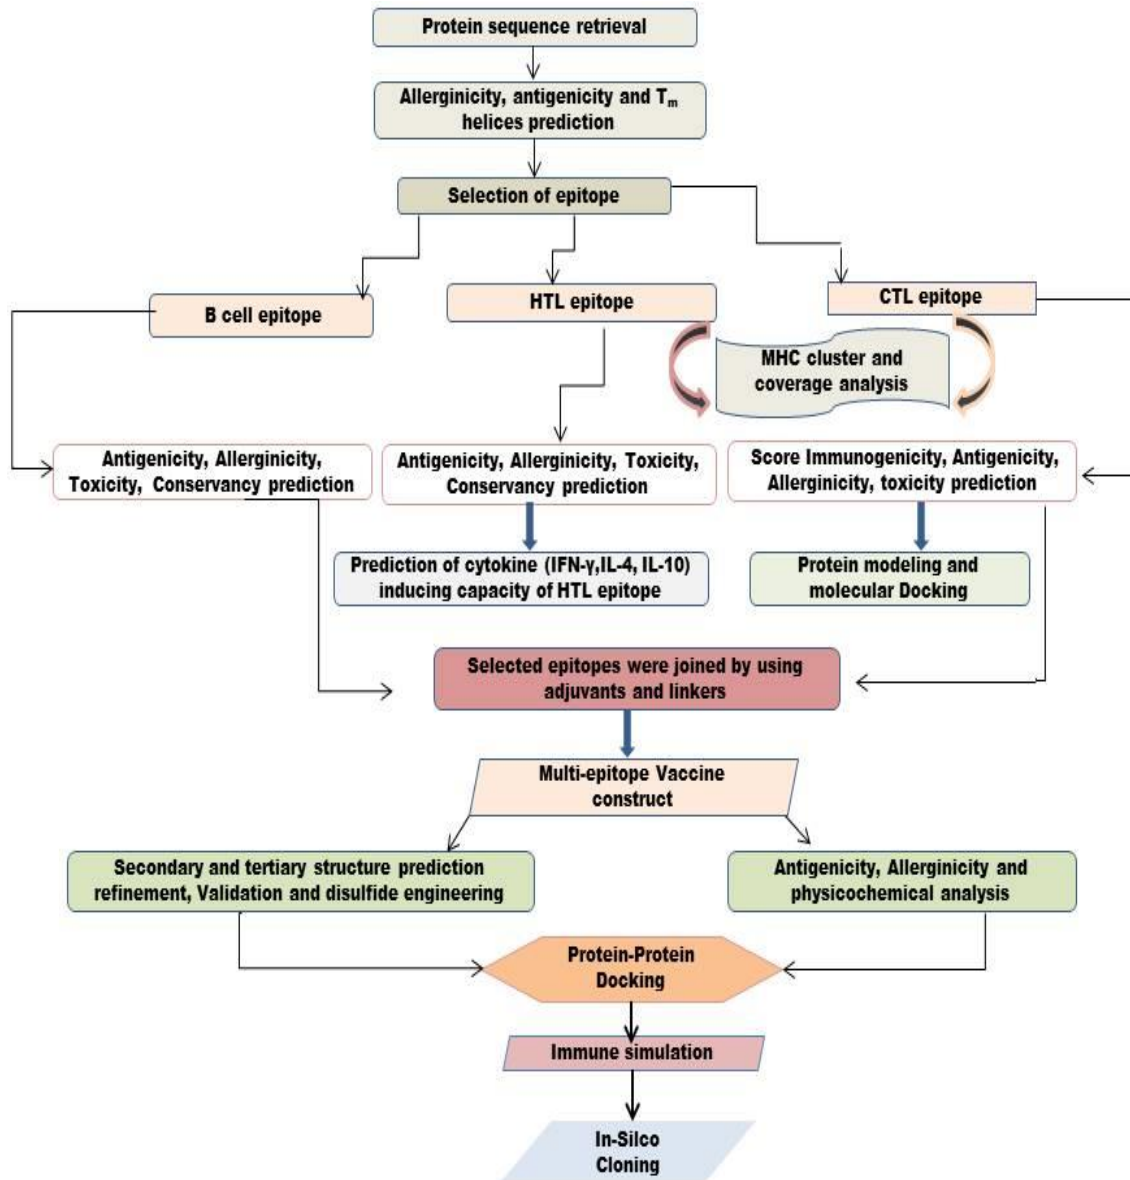

**Figure 1.** Methodology for multi-epitope vaccine construction, Docking, Simulation and Cloning

MAKLSTDELLDAFKEMTLEL SDFVKKFEETFVTAAPVAVAAAGAAPAGA AVEAAEEQSEF  
 DVILEAAGDKKIGVIKVVREIVSGLGLKEAKDLVDGAPKPLEKVAKEAADEAKAKLEAAGATV  
 TVKEAAAKNSYGP GPGNTGPGPGVGKGLRILAFGPGPGFPIRGLAEGPGPGDDGGPGPGLRGDA  
 GVS GPGPGIIFYQQGSGGSITTIGPGPGSGSVSGLTGPGPGPLHGFGHPGPGVHQYGDQTGPGP  
 GNGCTSAGDHYGPGPGNPFKTHGGGPGPGPNDRIKHIGDLGNIVAGANGGPGPGDIKLRGPLS  
 VIGHSLVVHAGPGPGANDDLGQGGPGPGTGNMREESLKTGNAGSRLACGPGPGYEFTVKDIGPG  
 PGNGVDVSLEK YRGHVCLIVNVGPGPGCKSGATDKNYRQLQEMHTRLGPGPGNQFGGQEPWA  
 EAEIGPGPGKKFVTEKYGVQFDMFSKIKGPGPGFLKSRQHGTLTNNIKWNFSKGP GPGVNGSDA  
 DDL YKGP GPGFLKSRQHGTLTNNIKWNFSKGP GPGQPKRYSPPTAPYDIEGDMGPGPGPIRLV  
 LVDQGIKFTDGP GPGDRINASDWPSMKSHFHFGQGP GGPLCLYDGDHQIVQSGGPGPGAILRHL  
 AGPGPGRKHNLNGGNELETTHIDGP GPGMFCEGVRDLH TKYTKMIYQAGPGPGILPVELAKFEG  
 PPGGCLDKFPLLKAYHQRMEDRPG GPGPGKLLATRDGP GPGDGKNFILGEKISYVDFVLFEGPGP  
 GIYAAYVAEVYAAYYAAYAYDTEKDSYAA YHHHHHH

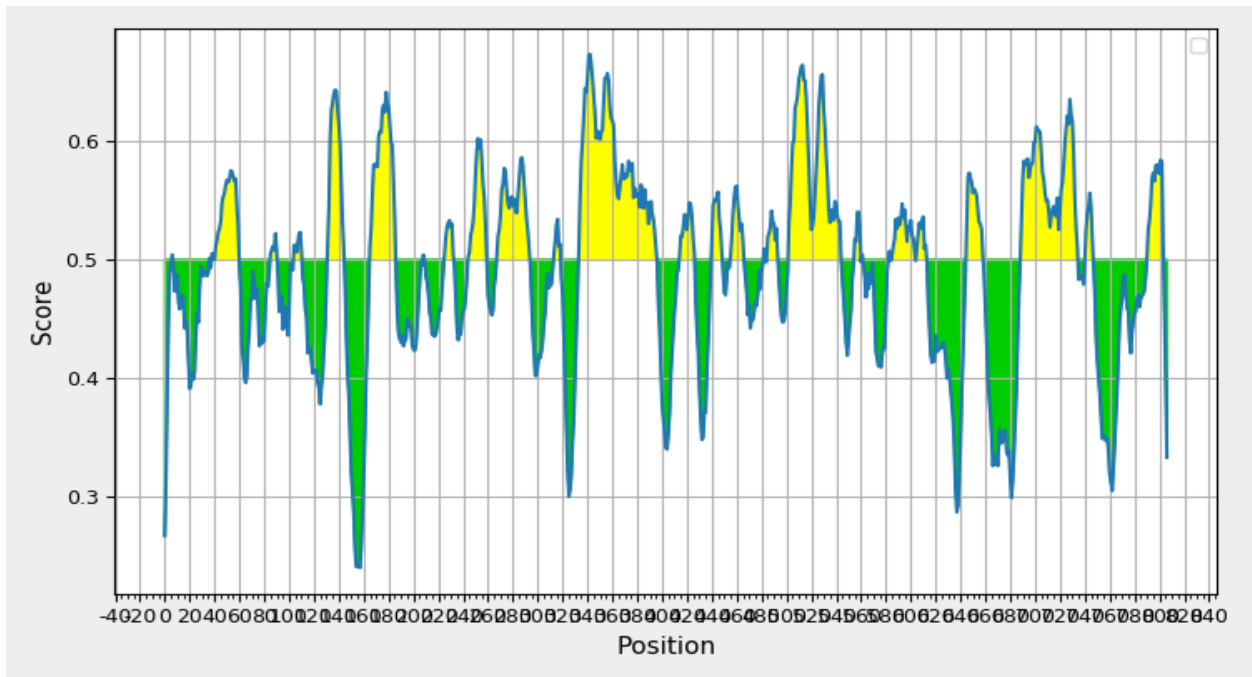

**Figure 2.** Visualization of vaccine constructs epitopic regions (A) Amino acids sequence of the PV<sub>AO</sub> adjuvant (yellow) B-cell and HTL (green) CTL (purple) and 6 His tag sky color (B) Yellow peaks represent epitopic regions and green non-epitopic regions.

MAKLSTDELLDAFKEMTLELSDFVKKFEETFEVTAAPVAVAAAGAAPAGAAVEAAEEQSEF  
 DVILEAAGDKKIGVIKVVREIVSGLGLKEAKDLVDGAPKPLLEKVAKEAADEAKAKLEAAGATV  
 TVK**EAAAKPPKAEP**AKEPEK**GSDGQKGEGPGPGETDDTKGGPGPGNQEKEENTNAPSNDVVL**  
**PGPGGAAMKCAILSPA**FKVR**DFSVKGGPGPGRV**RILLTNLLRESG**KKAAEEVGP**PGGAFTTRGRSM  
 GVAAR**QQLNTNGPGPGDEEEDKKEKDKKGGPGPDDEAEEEGPGPGGEIEDV**GEGPGPGKKDED  
 KEK**KEGPGPLAVKHFS**VEG**QLEFRALLFV**GGPG**SAGGMPGGPGMPGGMPSGAPGAGST**  
**GGGPTGPGPGKSTAGD**THLGGEDFDNR**MVNGPGPGA**VITVPA**YFNDSQRQATKDSG**PGPG**GAILS**  
**PAFKVGP**PG**V**RILLTNLL**GPGPGYIKITPNKAG**PG**GERIMKAQAL**AA**YFSKLFYD**TYAA**YKLT**  
 VLGATYAA**YNTNIKNTIIAAYMSEEM**NGETAAY**QLEFRALLFAAYMSLIINTFYAAY**MSLIINTF  
 AA**YETALLSSGFAAYVKDLV**VLLFAAY**YMKENQKQIY**AA**YTRG**TKITLYAA**YMTDPIDEY**AA**Y**  
 YSDNQPGV**LAAYYTNITRARFAAYSSSQASIEI**HHHHHH

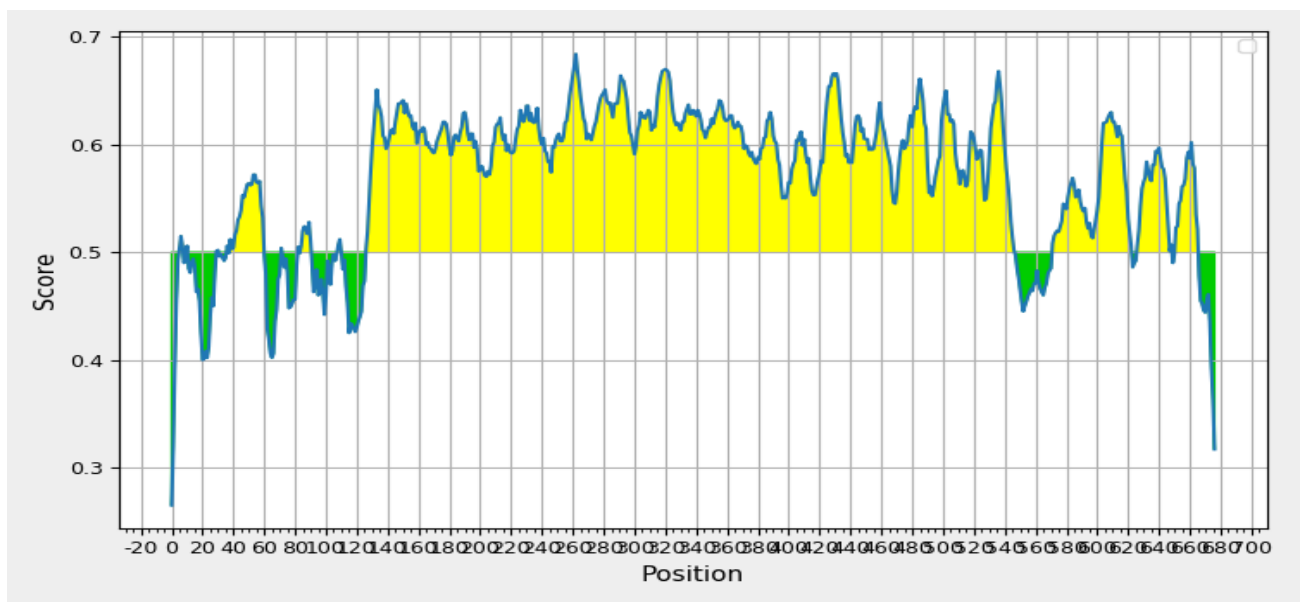

**Figure 3.** Visualization of vaccine constructs epitopic regions (A) Amino acids sequence of the PV<sub>HSP</sub> adjuvant (yellow) B-cell and HTL (green) CTL (purple) and 6 His tag sky color (B) Yellow peaks represent epitopic regions and green non-epitopic regions.

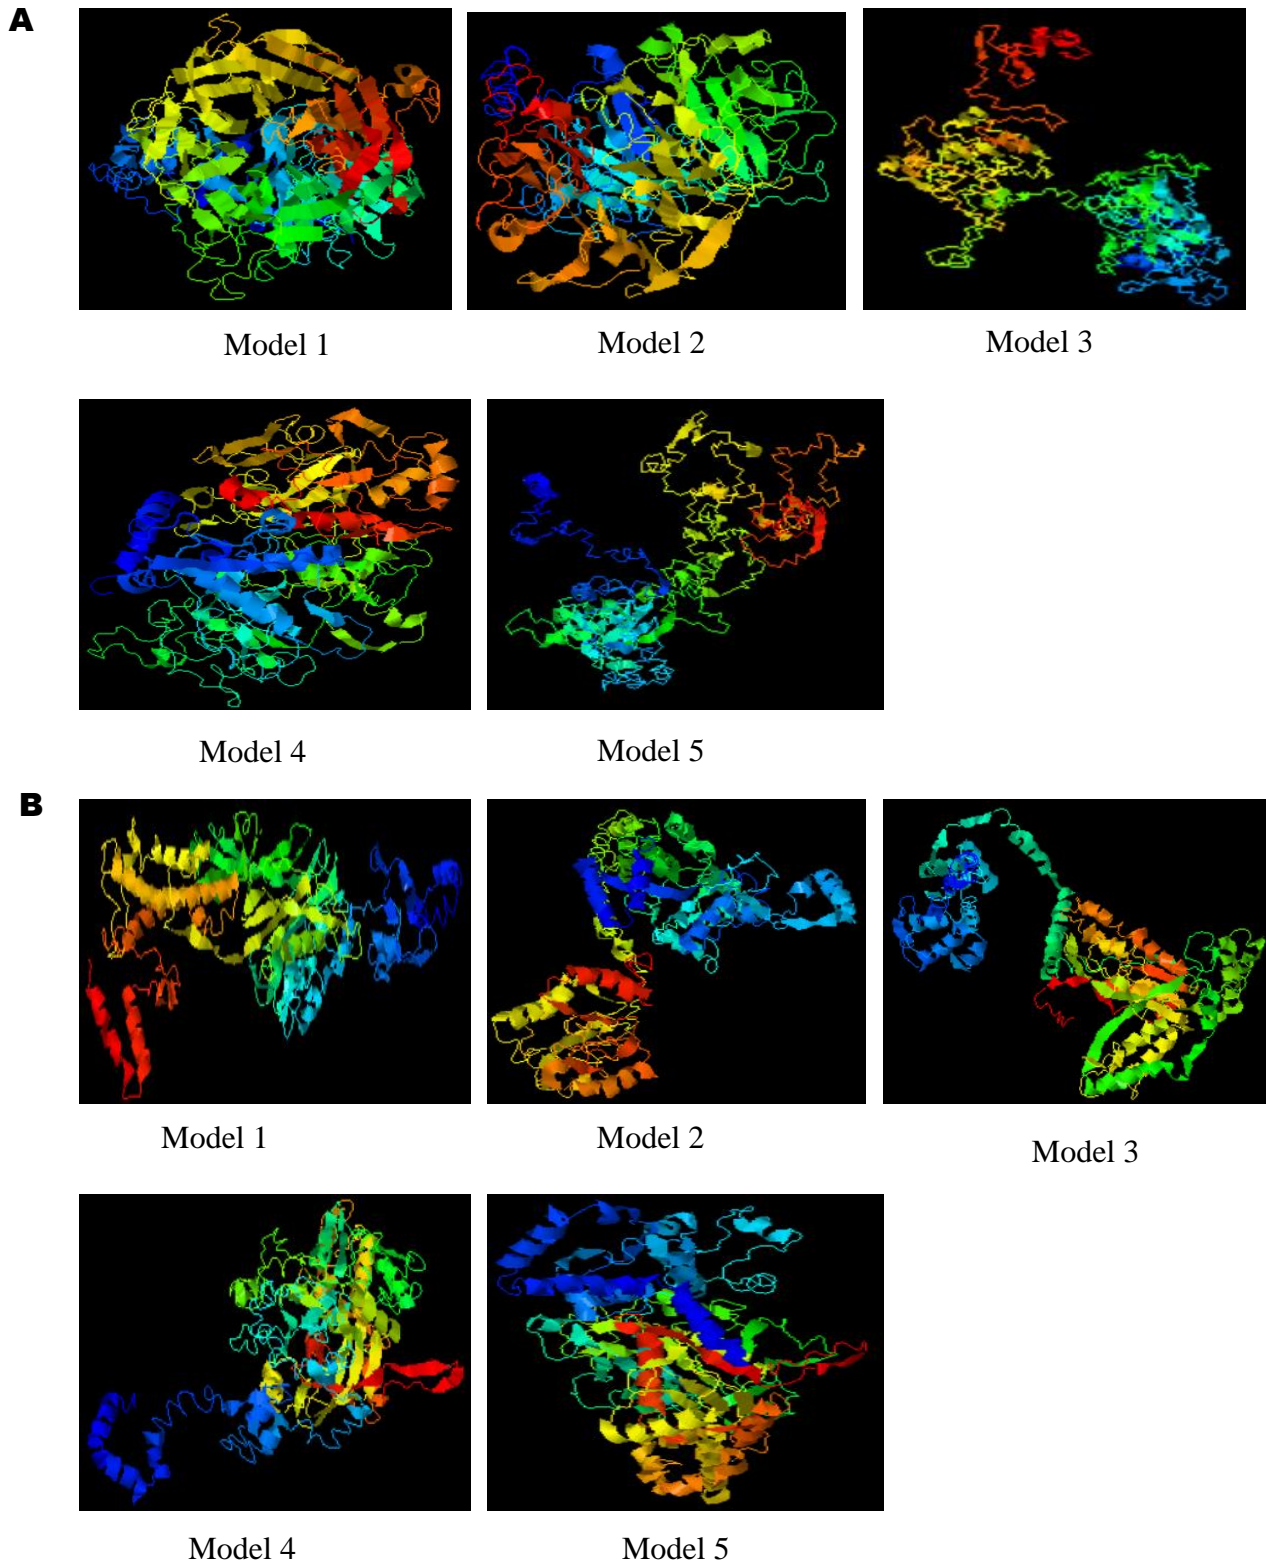

**Figure 4.** I-TASSER model of PV<sub>AO</sub> and PV<sub>HSP</sub> vaccine candidate for model 1 to 5 (A) PV<sub>AO</sub> vaccine candidate models and (B) PV<sub>HSP</sub> vaccine candidate models



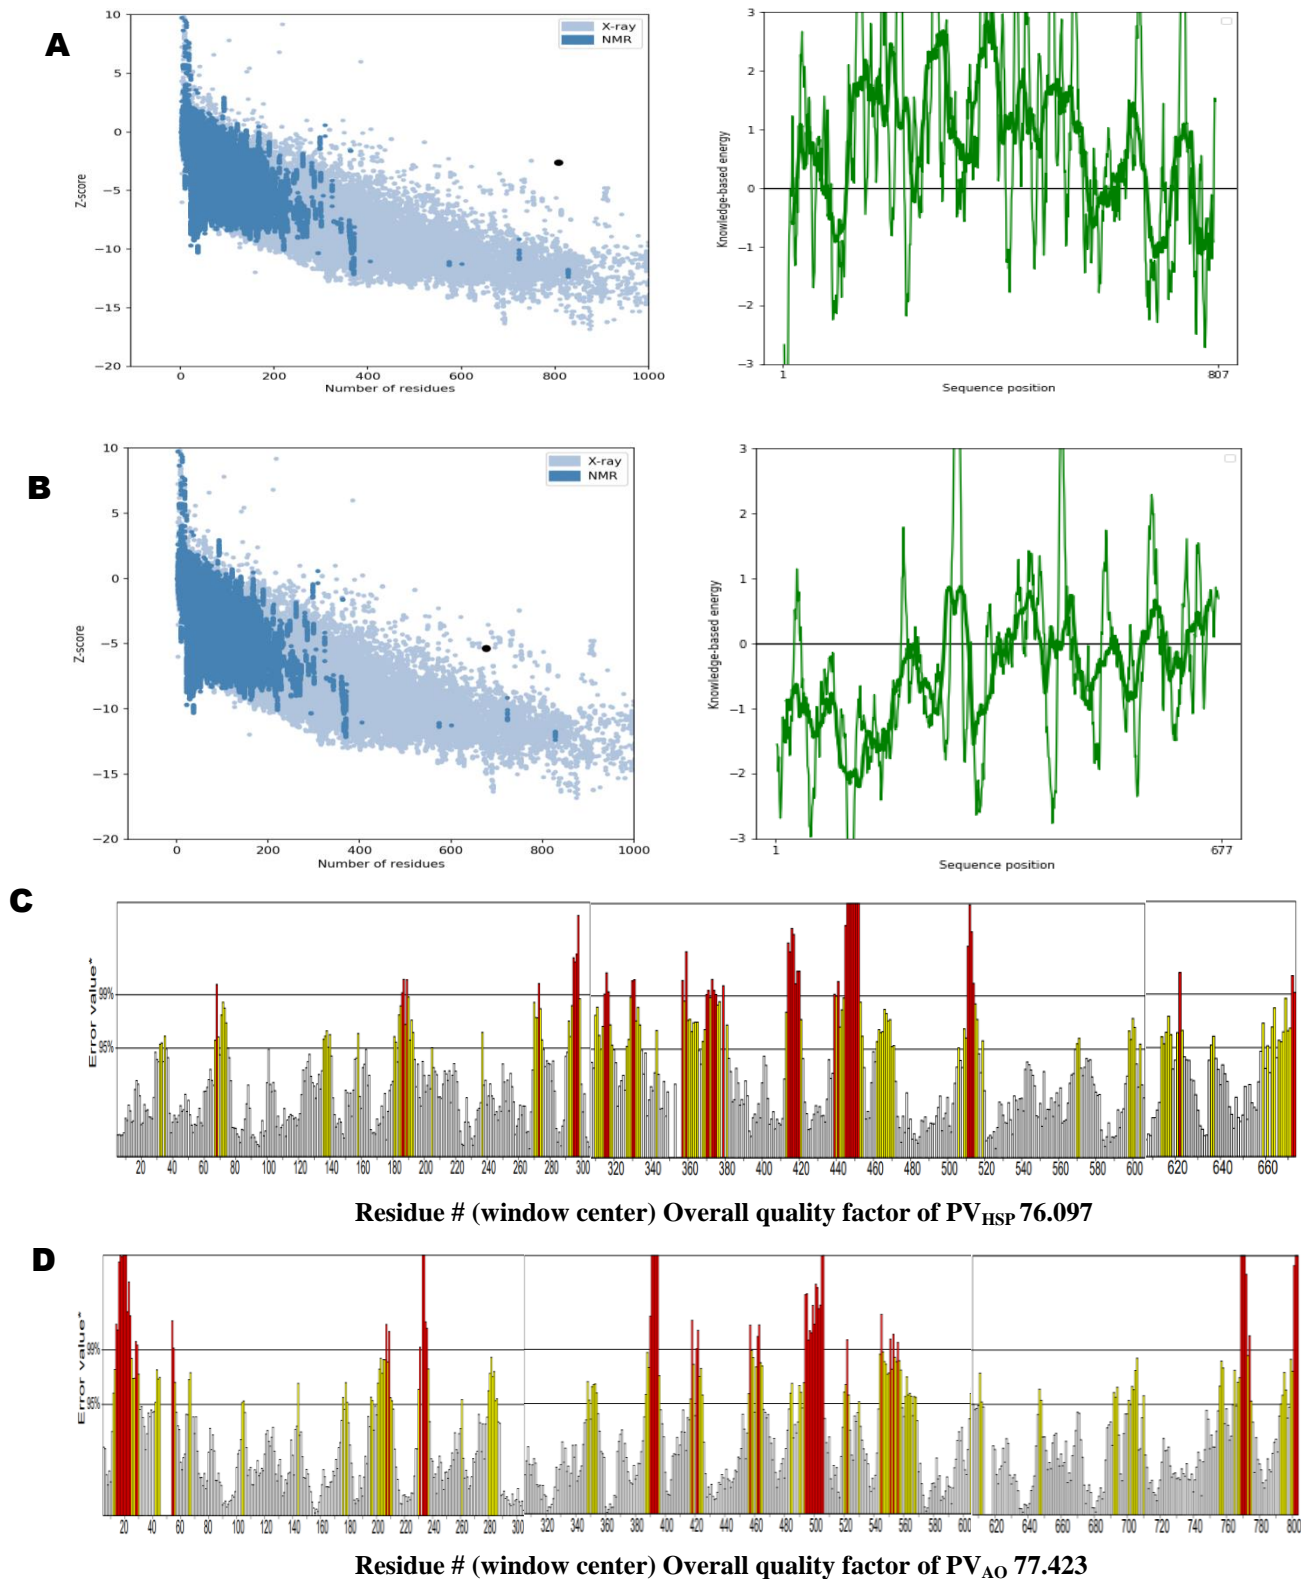

**Figure 5.** Protein quality structure of PV<sub>AO</sub> and PV<sub>HSP</sub> predicted by ProSA Z-score overall model quality. (A) PV<sub>AO</sub> vaccine candidate and (B) PV<sub>HSP</sub> vaccine candidate (C) ERRAT PV<sub>HSP</sub> and (D) ERRAT PV<sub>AO</sub>

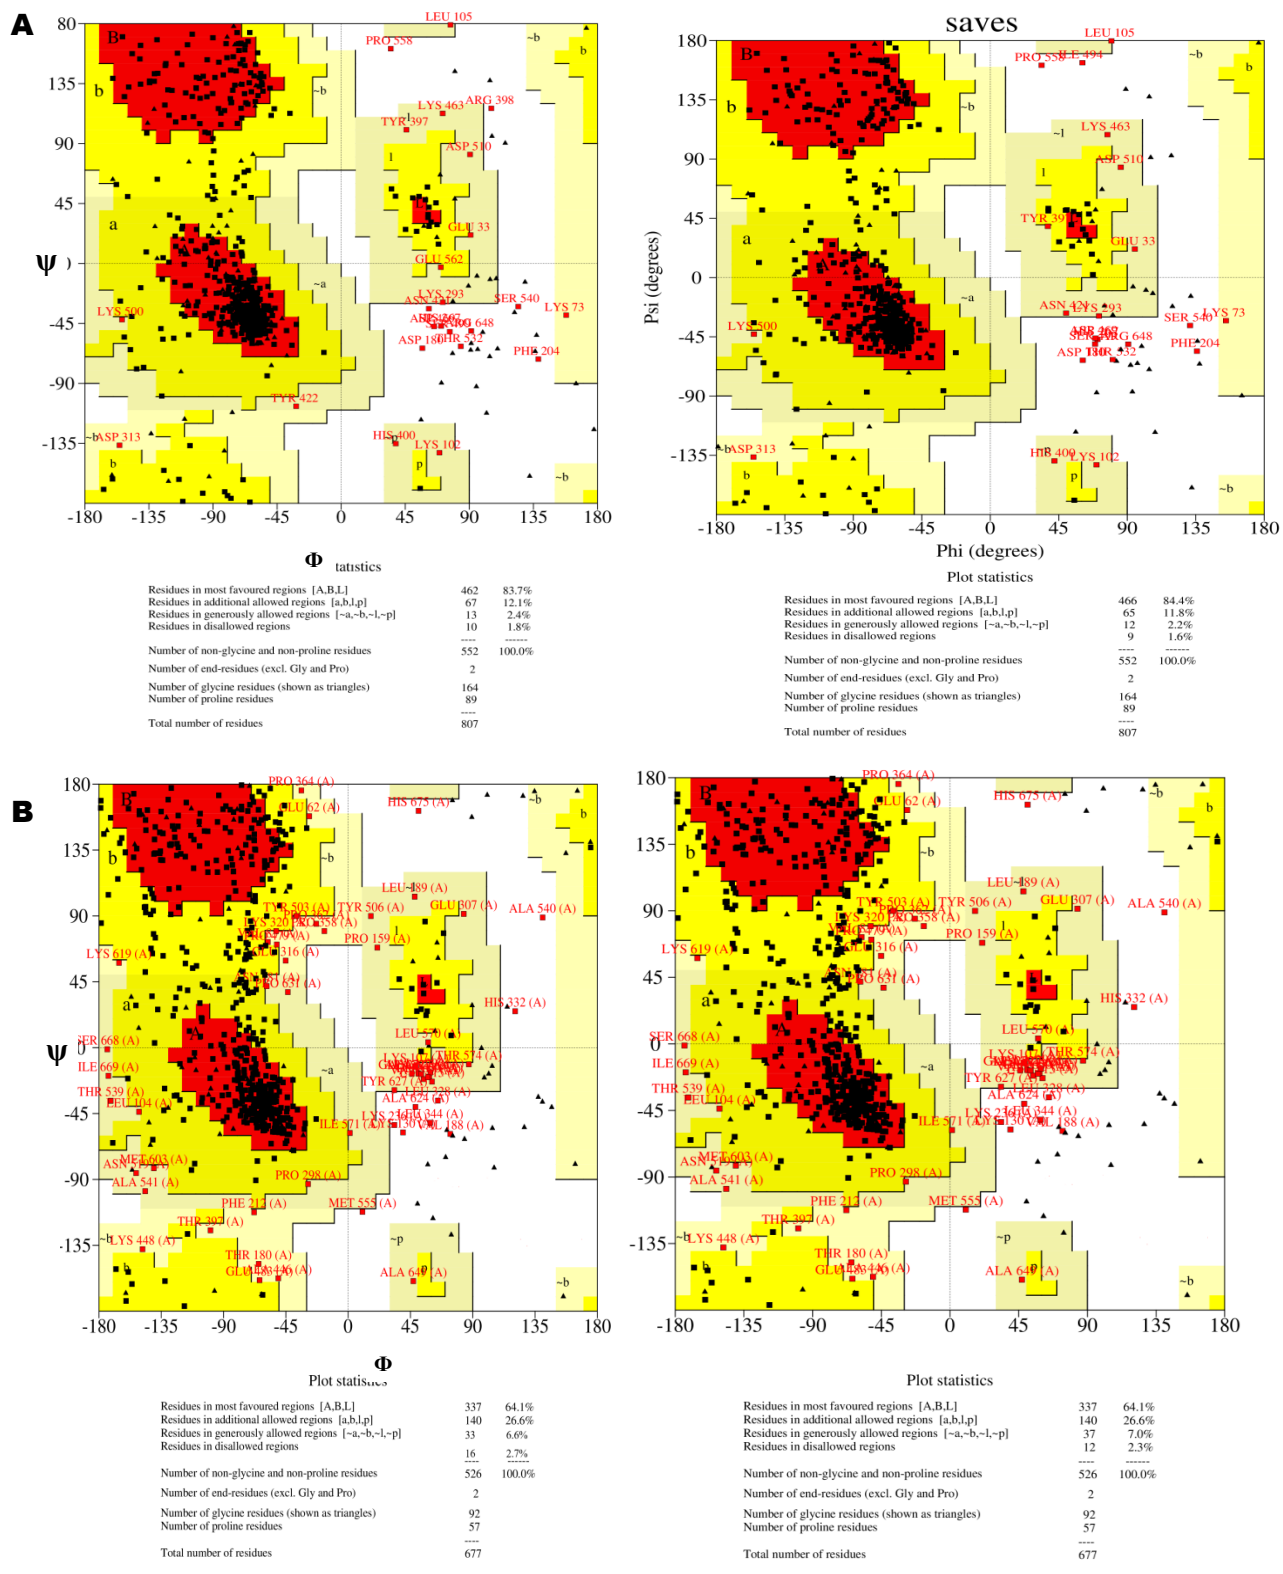

**Figure 6.** PROCHECK results of PV<sub>AO</sub> and PV<sub>HSP</sub> candidates (A) PV<sub>AO</sub> (before and after refinement) (B) PV<sub>HSP</sub>, and (before and after refinement) showing the amino acid residues in Ramachandran Plot before and after refining process

**A**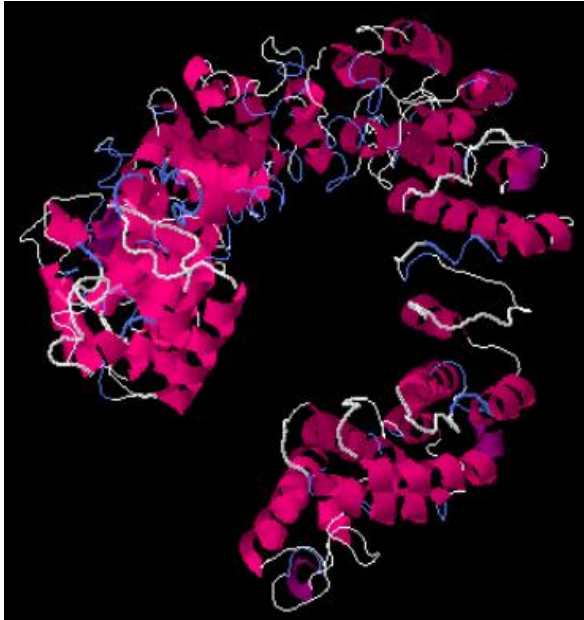**B**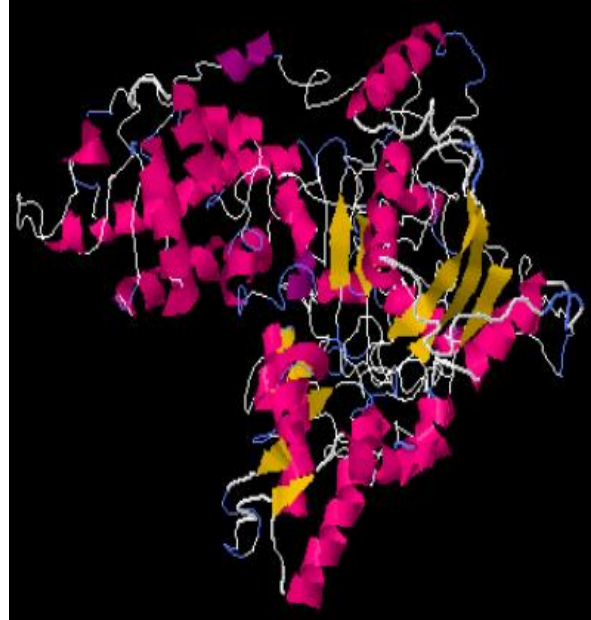

**Figure 7.** Disulfide bond-bridge (white lines) of vaccine constructs is shown (A) PV<sub>AO</sub> and (B) PV<sub>HSP</sub>
